# Supplementary material for: Adherence to antiretroviral drug therapy in adult patients who are HIV-positive in Northwest Ethiopia: a study protocol
Source: PubMed Central journal article supplement — BMJ Open. 2013 Oct 31;3(10):e003559. doi: 10.1136/bmjopen-2013-003559 (PMC3816234; doi:10.1136/bmjopen-2013-003559), 2013-10-31
Supplement: bmjopen-2013-003559.draft_revisions.pdf [file bmjopen-2013-003559.draft_revisions.pdf]

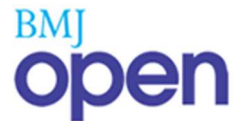

## Adherence with antiretroviral drug therapy in Ethiopian adult HIV-positive patients

|                                 |                                                                                                                                                                                                                                                                                                                                |
|---------------------------------|--------------------------------------------------------------------------------------------------------------------------------------------------------------------------------------------------------------------------------------------------------------------------------------------------------------------------------|
| Journal:                        | <i>BMJ Open</i>                                                                                                                                                                                                                                                                                                                |
| Manuscript ID:                  | bmjopen-2013-003559                                                                                                                                                                                                                                                                                                            |
| Article Type:                   | Protocol                                                                                                                                                                                                                                                                                                                       |
| Date Submitted by the Author:   | 07-Jul-2013                                                                                                                                                                                                                                                                                                                    |
| Complete List of Authors:       | Bezabhe, Woldesellassie; University of Tasmania, School of Pharmacy<br>Peterson, Gregory; University of Tasmania, School of Pharmacy<br>Bereznicki, Luke; University of Tasmania, School of Pharmacy<br>Chalmers, Leanne; University of Tasmania, School of Pharmacy<br>Gee, Peter; University of Tasmania, School of Pharmacy |
| <b>Primary Subject Heading</b>: | HIV/AIDS                                                                                                                                                                                                                                                                                                                       |
| Secondary Subject Heading:      | Health services research, Infectious diseases, Pharmacology and therapeutics                                                                                                                                                                                                                                                   |
| Keywords:                       | HIV & AIDS < INFECTIOUS DISEASES, CLINICAL PHARMACOLOGY, Infectious disease/HIV < NEUROLOGY                                                                                                                                                                                                                                    |
|                                 |                                                                                                                                                                                                                                                                                                                                |

SCHOLARONE™  
Manuscripts

# Adherence with antiretroviral drug therapy in Ethiopian adult HIV-positive patients

Bezabhe, Woldesellassie; Peterson, Gregory; Bereznicki, Luke; Chalmers, Leanne; Gee, Peter

## Abstract

**Introduction:** Achievement of optimal adherence and management of antiretroviral toxicity pose great challenges among Ethiopian patients with HIV/ AIDS. There is currently no long-term follow-up study that identifies the barriers to, and facilitators of adherence to antiretroviral therapy (ART) in the Ethiopian setting. Therefore, we aim to investigate the level of adherence to ART and a wide range of potential facilitators of, and barriers to adherence, including adverse drug reactions (ADRs) occurring with ART.

**Methods and analysis:** We will conduct a one-year, prospective, longitudinal study involving adult patients with HIV/AIDS commencing on ART between December 2012 and March 2013. Data will be collected on patients' appointment dates in the ART clinics. Adherence to ART will be measured using pill count, medication possession ratio, and patient's self-report methods. The primary outcome of the study will be the proportion of patients who are adherent to ART regimen at 3, 6, 12 months of the study using Pill Count (PC). The optimal level of adherence in this study will be taking 95% or more of the dispensed ART regimen at a point in time. Data will be analysed using the descriptive and inferential statistical procedures.

**Ethics and dissemination:**

1  
2  
3 Ethics approval was obtained from the Tasmania Health and Medical Human Research Ethics  
4  
5 committee (Approval Number: H0012722); and Bahir-Dar University's Ethics Committee  
6  
7 (Approval Number: RCS/567/2004). The result of the study will be reported in peer-reviewed  
8  
9 scientific journals, conferences, and seminar presentations.  
10

## 11 **Article summary**

### 12 **Article focus**

- 13  
14  
15  
16  
17  
18  
19  
20  
21  
22  
23  
24  
25  
26  
27  
28  
29  
30  
31  
32  
33  
34  
35  
36  
37  
38  
39  
40  
41  
42  
43  
44  
45  
46  
47  
48  
49  
50  
51  
52  
53  
54  
55  
56  
57  
58  
59  
60
- To establish the level of adherence and identify factors that influence adherence to ART in Ethiopian HIV/AIDS patients with cohort study.

### **Key messages:**

- Factors that affect adherence to ART are not still identified in Ethiopia HIV/AIDS with long-term follow-up study.
- Data for this prospective cohort study over the period of at least of 16 months will identify important factors associated long-term adherence to ART that are not still identified in the setting.

### **Strength and limitations of this study**

- This study is the first of its kind conducted in the country to identify factors that affect adherence to ART in the treatment naïve patients who initiated ART.
- Rates of patient drop out; loss to follow up and death are high in this setting, which may challenge the success of the project.

## INTRODUCTION

Ethiopia is home to approximately 800,000 patients with HIV/AIDS and the prevalence of HIV/AIDS in the general population is estimated to be 1.5%(1). The introduction of the free antiretroviral therapy (ART) program in Ethiopia, since 2005, decreased mortality and morbidity, and improved the quality of life of patients(2, 3). In the last 8 years, decentralization and scale-up of the HIV care program has occurred, and by the end of 2011, 249,174 adult patients (86% of eligible patients) were on ART(1).

Achievement of optimal adherence, management of antiretroviral drug-related toxicities, and patient retention(4) are becoming the greatest challenges in the management of HIV/ADS in Ethiopia. A cross-sectional study in Ethiopian patients reported adherence rate of 88.1%(5), which is below the near perfect adherence ( $\geq 95\%$ ) required to maintain the effectiveness of ART(6).

Patient retention in HIV care facilities is low, and averaged 51% to 85% in 55 Ethiopian HIV care facilities in a 2 year patient follow-up study(4). Similarly, a 2011 report from the Ethiopian Ministry of Health indicated that patients dropping out from HIV care was a serious issue, with up to 40% of patients who initiated ART dropping out from treatment in some regions of the country(7). Mortality and drop out from antiretroviral treatment are more common in the first year of patient follow-up than later in Ethiopia(8).

1  
2  
3 Adherence to medication is a dynamic behaviour affected by factors related to treatment  
4 regimen complexity, patient related variables, patient-health care provider relationships, and  
5 the quality of health care services(9). Patient adherence to ART is influenced by regimen  
6 related factors such as pill burden, frequency of dosing, ADRs, fluid and dietary  
7 restrictions(10). Similarly, patient related factors such as lack of transport, shortage of food,  
8 use of traditional medicine, alcohol abuse, depression, stigma and discrimination, and lack of  
9 social support undermine adherence(11-14). Further, a poor patient-health care provider  
10 relationship and low quality services, such as lack of confidentiality and privacy, and drug  
11 stock out hamper adherence with ART(12).  
12  
13  
14  
15  
16  
17  
18  
19  
20  
21  
22

### 23 **JUSTIFICATION FOR THIS STUDY**

24  
25  
26 Adverse effects of ART are common and cause morbidities and mortalities, and have been  
27 reported to be a cause of non-adherence. Previous studies were retrospective cross-sectional  
28 studies, lacked active surveillance and did not focus on treatment naïve HIV/AIDS patients.  
29 While one prospective study has investigated adherence to ART in Ethiopia(15) it was only  
30 conducted for three months and also did not focus on treatment naïve patients. A prospective  
31 study over a longer period of time focusing on treatment naïve patients is required to assess  
32 the level of adherence in this patient group and its barriers and facilitators. There is also a  
33 need to conduct a prospective study in Ethiopian patients with HIV/AIDS to assess the  
34 emergence of ADRs to ART in clinical practice.  
35  
36  
37  
38  
39  
40  
41  
42  
43  
44  
45  
46

### 47 **OBJECTIVES**

48  
49  
50 The objectives of this study are to establish the level of adherence and identify factors that  
51 influence adherence and assess the incidence of ADRs and associated risk factors in  
52 Ethiopian patients with HIV/AIDS initiated on ART.  
53  
54  
55

## METHODS AND ANALYSIS:

### Study design

This study is a prospective, longitudinal cohort study, in which adult Ethiopian patients with HIV/AIDS initiated on ART will be followed from the time of ART initiation (Month (M)=0) to 12 months of therapy (M=12). ART-initiated patients have an appointment every month for six months and every three months thereafter in ART clinics in Ethiopia; research pharmacists will collect data on appointment dates. The timeline of data collection activities are structured as shown in figure 1. The sequencing and repeating of measures is to observe the time pattern of different predictors on adherence of ART in treatment naïve patients. Depression, stigma, HIV-treatment knowledge, healthcare relationship, and belief about medication, and HIV-symptom index may affect adherence in a time-dependent manner and are measured before and after 6 months of patients' ART. Data's regarding the concomitantly administered medications, comorbidities, ADRs, and laboratory values are collected on every appointment dates. We have also designed a separate qualitative study to be conducted side by side involving patients taking ART, and nurses and peer counsellors working in ART clinics to help to explore the unique factors that affect adherence in these settings.

1  
2  
3  
4  
5  
6  
7  
8  
9  
10  
11  
12  
13  
14  
15  
16  
17  
18  
19  
20  
21  
22  
23  
24  
25  
26  
27  
28  
29  
30  
31  
32  
33  
34  
35  
36  
37  
38  
39  
40  
41  
42  
43  
44  
45  
46  
47  
48  
49  
50  
51  
52  
53  
54  
55  
56  
57  
58  
59  
60

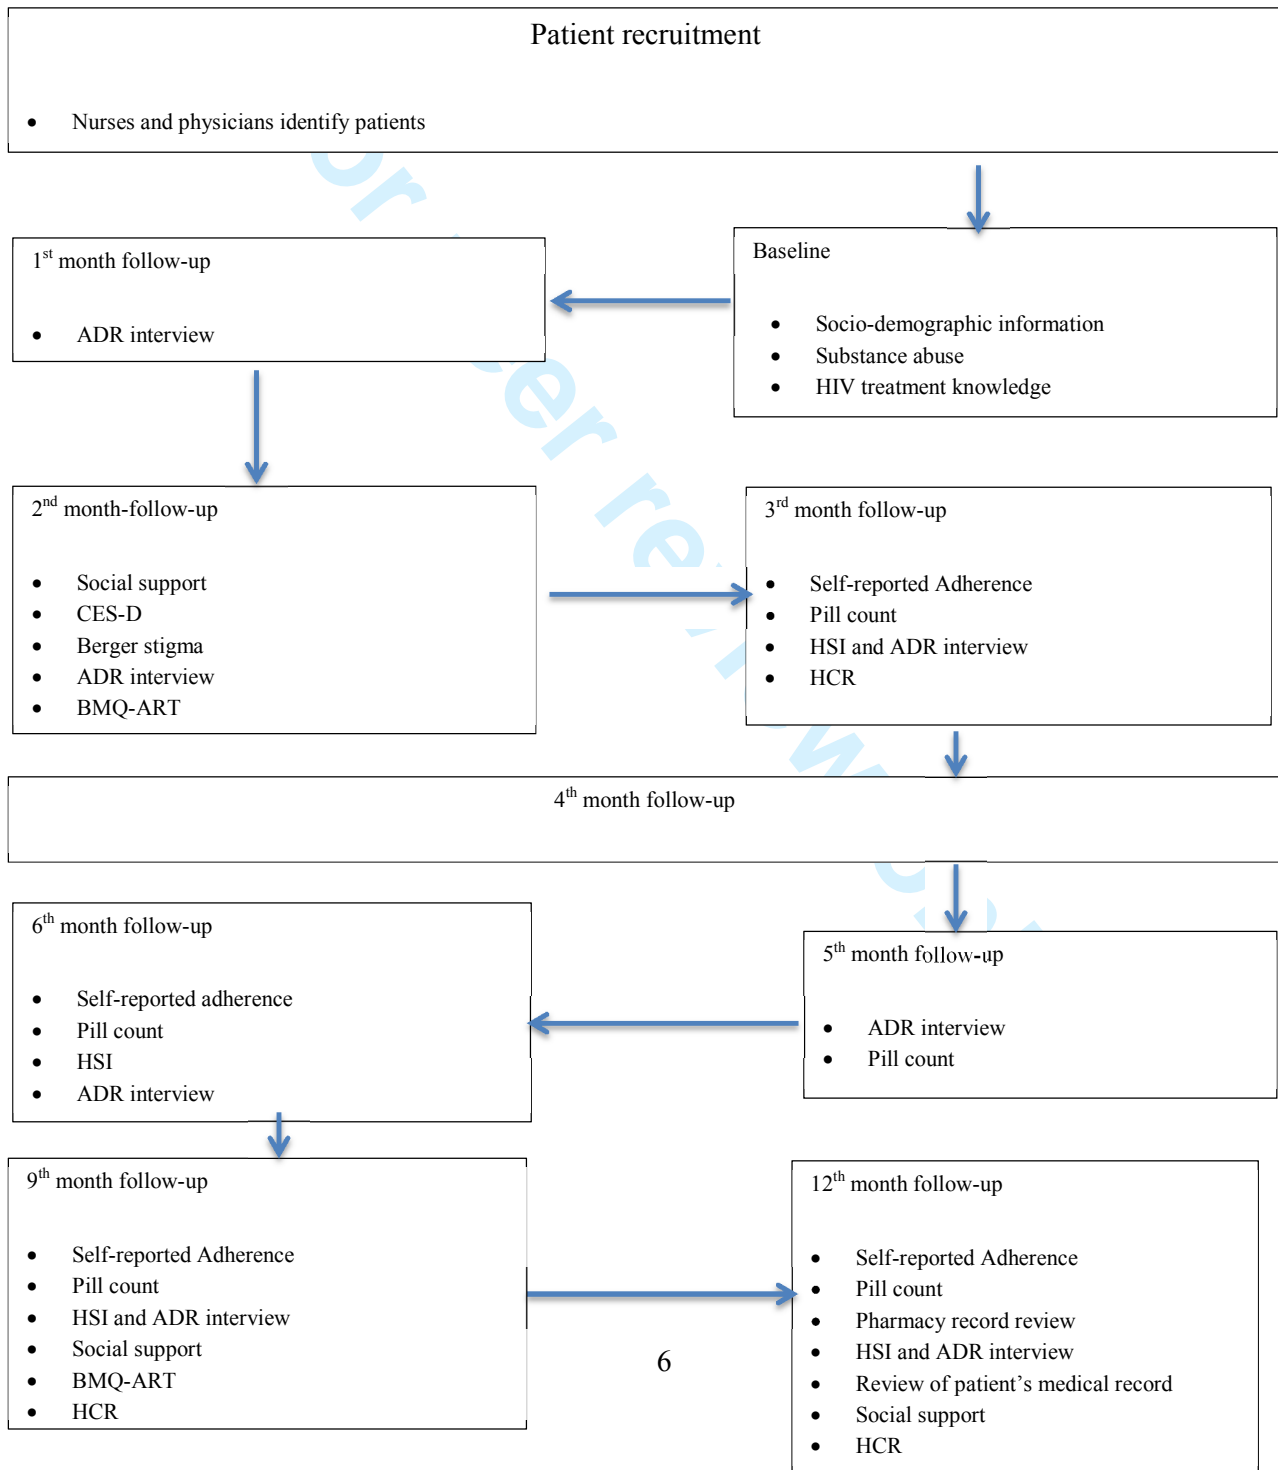

**Figure 1 Study design**

CES-D=Centre for Epidemiological Studies-Depression

HSI=HIV-Symptom Index

ADR=Adverse Drug Reaction

BMQ=Belief about Medication Questionnaire

HCR=Health Care Relationship

**Study setting**

The project will be implemented in two hospitals in the North-West Ethiopia: Gondar University Hospital and Felege-Hiwot Hospital. This study will be conducted between December 2012 and March 2014, which will allow a follow-up period of 12 months for each patient.

**Inclusion criteria:**

- All HIV/AIDS patients at least 18 years old being initiated on ART for the first time.

**Exclusion criteria:**

- Participants whose follow-up is to be conducted in outlying areas, rather than at the hospital where ART was initiated.

**Sample size**

The sample size for this study was determined based on a previous study, where 76% of patients had optimal dose, time, and food adherence to ART(15). Taking a 95% confidence level, and precision of 0.07, the sample size was estimated to be 143.

Based on an average of 43 new patients per month, within four months of recruitment in each ART clinics, the pool of patients for recruitment will be 344. Allowing for a non-participation



1  
2  
3 rate of 23%, and loss to follow-up of up to 30% (Mekides B and Desalew K, July 2012,  
4  
5 personal communication), the sample size is achievable.  
6  
7

## 8 **Recruitment**

9  
10 Between December 2012 and March 2013, participants will be initially invited by their nurses  
11 to participate in this study. At the first visit (usually two weeks before ART initiation), nurses  
12 will give patients information about the study and invite them to participate. If patients are  
13 interested in participating in the study, the research pharmacists to discuss the research will  
14 contact them. Informed consent will be obtained from volunteer participants using standard  
15 information statement and consent forms. Each of participants will receive \$US 3 to  
16 reimburse their time and transport cost. The characteristics of patients who declined  
17 participation will be collected to determine the representativeness of the sample.  
18  
19  
20  
21  
22  
23  
24  
25  
26  
27  
28

## 29 **Measures**

30  
31 The questionnaires have been spread to track changes of the different parameters over time as  
32 shown in figure 1, while minimizing questionnaire fatigue. Assessment of adherence is a  
33 problematic issue as there is no gold standard method of measurement(16). In this study self-  
34 report, PC and Medication Possession Ratio (MPR) will be used to measure adherence at  
35 month 3, 6, 9, and 12. Use of multiple measures of adherence is recommended in literature as  
36 there is no single optimal measure of adherence(16). Adherence to medication found using  
37 multiple measures would be converted in to percentage of dose adherence and triangulated.  
38 Participants will access both fixed combination and loss combination ART dose. Percentage  
39 adherence to each of the pills will be calculated and the lowest dose adherence is taken as the  
40 adherence for the given patient.  
41  
42  
43  
44  
45  
46  
47  
48  
49  
50  
51  
52  
53  
54  
55  
56  
57  
58  
59  
60

1  
2  
3 The primary outcome of the study will be the proportion of patients who are adherent to ART  
4 regimen at 3, 6, 12 months of the study using PC. The optimal level of adherence in this  
5 study will be taking 95% or more of the dispensed ART regimen at a point in time.  
6  
7

8  
9 Adherence from PCs will be calculated by dividing the difference between current and  
10 previous PCs by the number of pills that have to be taken during the same period(5). PCs  
11 have been found to be an economic and reliable measure of adherence in resource-limited  
12 settings(17).  
13  
14  
15  
16  
17

18  
19 A modified AIDS Clinical Trial Group (ACTG) self-report adherence questionnaire that asks  
20 patients how many doses they missed in the last 7 days will be used to measure dose  
21 adherence of patients to ART. In addition, two four-item modified questionnaires from  
22 ACTG will be used to measure time and food adherence in the last 7 days(18). Assessing  
23 multiple dimensions of adherence by using all items of ACTG self-report adherence  
24 questionnaires has provided a strong measure of adherence(19). Self-reported adherence is  
25 well correlated with viral load suppression and suitable for resource-limited settings because  
26 of its low cost(20).  
27  
28  
29  
30  
31  
32  
33  
34  
35  
36

37 Patients stating they have missed medications will be asked to indicate reasons why they  
38 skipped medication from a list of 16 reasons (e.g. away from home, busy with other things,  
39 simply forget). Fourteen of the reasons for non-adherence are taken from ACTG(18) and two  
40 reasons associated with traditional medicine and religious treatment, respectively, were  
41 obtained from literature review(11).  
42  
43  
44  
45  
46  
47  
48

49 Pharmacy refill records will be reviewed and the MPR will be calculated by dividing the total  
50 number of days covered with the medication dispensed by the number of days between the  
51 first fill and the last refill plus the days' supply of the last refill(21). This method is suitable  
52  
53  
54  
55

1  
2  
3 in our study as HIV-medication is refilled only from the nearby governmental hospital/health  
4  
5 centre pharmacy in Ethiopia(1). PC and MPR are superior over self-reported adherence  
6  
7 measures and well correlated with virological failure and clinical outcomes(22).  
8  
9

10 Depression in patients will be evaluated using the seven-item questionnaire of the CES-D  
11  
12 scale. This scale has been extensively applied in different settings, including settings to assess  
13  
14 depression in HIV/AIDS patients(18). The Revised Berger HIV stigma scale will be used for  
15  
16 measurement of stigma. The 10-items of Berger stigma scale have been validated in HIV-  
17  
18 positive youth(23). Berger stigma scale was used in Kenyan patients with HIV/AIDS(24).  
19  
20 The higher score indicates the existence of greater stigma(25).  
21  
22

23  
24 Previous studies have suggested that a lack of social support predisposes patients with  
25  
26 HIV/AIDS(26). Patients' satisfaction with the social support they get from family members  
27  
28 and friends and the help of the support for remembering their medication will be measured  
29  
30 using two four-point scale social support questionnaires(18).  
31  
32

33  
34 The HIV treatment knowledge scale will be used to measure patients' knowledge on  
35  
36 adherence, ADRs and drug resistance. This instrument has been developed and validated by  
37  
38 Balfour et al(27) in HIV/AIDS patients with ART.  
39

40  
41 The BMQ will be used to measure patients' belief about ART. The BMQ consists of two  
42  
43 five-item scales probing patients' belief about the necessity of the given medication and their  
44  
45 concerns about possible ADRs(28, 29).  
46  
47

48 The trust between the patients and health care providers will be measured using the 13-item  
49  
50 HCR trust scale. Items are rated from 0 to 4, the total score ranges from 0 to 52 and a higher  
51  
52 score indicates a greater level of trust(30).  
53  
54

1  
2  
3 The research pharmacist will interview patients and carers, and review patients' medical  
4 records for potential ADRs experienced in the preceding four weeks and record the following  
5 information using an ADR follow-up documentation form: signs and symptoms of ADRs,  
6 interventions, outcomes of interventions, laboratory test results, co-morbidities, concomitant  
7 medications (name, start and stop date, dose, route, indication), hospitalisations, reasons for  
8 regimen changes and new regimens.  
9

10  
11 Self-completed HSI will be used to measure patients' concern about 20 possible symptoms  
12 associated with ART ADRs. The research pharmacist will interview patient, their caregiver,  
13 and physician, and refer patient's medical record and document detail information regarding  
14 adverse effect patients diagnosed with. The severity of ADRs will be rated using the WHO  
15 ADR severity scale(31). Similarly, a physician and a pharmacist will determine the causality  
16 of each ADRs using Naranjo's probability scale(32). The reliability between raters and within  
17 raters has improved significantly ( $p < 0.001$ ) with the use of Naranjo's probability  
18 scale(32). This scale has been widely used in various settings(33). In addition, the Schumock  
19 and Thornton scale will be used to rate the preventability of adverse drug events(34).  
20  
21

22  
23 Socio-demographic and economic variables such as age, gender, marital status, religion, level  
24 of education, number of children, employment status, and disclosure of HIV status, average  
25 number of meals per day, monthly income, transportation costs to the clinic, and waiting time  
26 in the hospital will be collected at the baseline.  
27  
28

29  
30 Laboratory data such as weight, height, history of ADRs, hepatitis B virus (HBV) and  
31 hepatitis C virus (HCV) infection status, WHO stage of HIV/AIDS, CD4 count, haematocrit,  
32 white blood cell (WBC) count, absolute neutrophil count, platelet count, liver function tests  
33 [alanine aminotransferase (ALT), aspartate aminotransferase (AST), alkaline phosphatase  
34  
35

1  
2  
3 (ALP), and bilirubin direct and total], renal function tests [such as blood urea nitrogen  
4 (BUN), serum creatinine, and urea], and ART regimen, date of initiation, dose and frequency  
5 of treatment, other concomitant medications and comorbidities will be recorded from  
6 patients' on each appointment date from their medical records using a baseline clinical and  
7 laboratory data collection sheet.  
8  
9

### 10 11 12 13 14 **Loss to follow-up**

15  
16  
17 'Drop out' from ART program is defined as patients not presenting for dispensing of their  
18 ART for the last 3 months. Patients' record will be used to calculate the number of days  
19 covered by the last dispensed HIV medication and 90 days will be added to determine the  
20 date when patients are categorized as 'drop outs'. Study subjects who do not make at least 6  
21 months follow-up will be excluded from the study. Patients lost from the follow-up will be  
22 tracked with peer counsellors working in the ART clinics of both hospitals using the  
23 registered address and phone number of them or their family member or close friend in their  
24 medical record to may help to avoid bias. The reason for being lost from follow-up will be  
25 recorded. Analysis of socio-demographic and clinical prognostic characteristics of those who  
26 lost from the treatment and those continuing ART will be compared.  
27  
28  
29  
30  
31  
32  
33  
34  
35  
36  
37  
38

### 39 40 **Missing items**

41  
42 The percentage of missing items for each scale will be calculated for each participant. If  
43 more than 10% items of the scale missed the patient total score of the scale will be excluded  
44 from data analysis at that time point. The proportion of missing participants for each variable  
45 of interest will be calculated.  
46  
47  
48  
49  
50

### 51 52 **Statistical analysis**

1  
2  
3 Descriptive univariate analysis will be conducted for socio-demographic and economic  
4  
5 variables. Adherers will be compared with non-adherers with the Pearson chi-squared test  
6  
7 for non-numerical variables and independent sample t-tests for numerical variables.  
8  
9  
10 Similarly, the characteristics of patients who developed ADRs and did not develop ADRs  
11  
12 will be compared with Pearson chi-squared tests for categorical variables and independent  
13  
14 samples t-test for continuous variables. Risk factors for adherence will be determined by  
15  
16 investigating the influence of socio-demographic, socio-economic variables, and  
17  
18 psychosocial variables, healthcare provider relationship, belief on medication and ADRs.  
19  
20 Risk factors for ADRs will be determined by investigating the effects of gender, age, body  
21  
22 mass index (BMI), CD4 count, history of drug allergy, comorbidities, concomitant  
23  
24 medications, and type of regimen. Multiple variable binary logistic regression will be used to  
25  
26 evaluate the independent influence of these risk factors on adherence. The exposure and the  
27  
28 potential confounders will be modelled in relation with the outcome variable for adjustment  
29  
30 using multiple-predictive regression model. The final model will be determined after  
31  
32 checking multicollinearity. All statistical calculations will be performed using SPSS Version  
33  
34 20.0. A p-value of <0.05 will be considered as statistically significant.  
35  
36  
37

## 38 **QUALITY CONTROL AND DATA MANAGEMENT**

39  
40  
41 Bilinguals performed the standard forward-backward translation to make the questionnaires  
42  
43 linguistically and conceptually equivalent(35). The English-speaking native researcher made  
44  
45 the forward translation of the validated questionnaires into Amharic. Two physicians working  
46  
47 in the ART clinics of Ethiopian hospitals reviewed the developed Amharic versions. A  
48  
49 professional translator made the backward translation to check the difference between  
50  
51 Amharic versions and the original English versions. The differences between the source  
52  
53  
54  
55

1  
2  
3 version and target version were settled with panel of committee meeting including the  
4  
5 forward translator, a physician and the back-translator and final Amharic versions were  
6  
7 developed. The Amharic version will be pretested with 60 adult patients receiving ART who  
8  
9 will not be included in the main study to check reliability and validity of the questionnaires.  
10  
11 Items found to be problematic by patients will be modified.  
12  
13

14  
15 The collected data will be checked for completeness, accuracy and clarity by the  
16  
17 investigators. This quality checking will be performed daily after data collection and  
18  
19 amendments will be made before the next data collection measure. Data clean up and  
20  
21 crosschecking will be done prior to analysis. Severity(31), causality(32), and  
22  
23 preventability(34) of adverse events will be separately assessed by a pharmacist and  
24  
25 physician using validated algorithms.  
26  
27

28  
29 The data will be entered from the two study sites in Ethiopia into a custom-built website  
30  
31 housed on a secure server at University of Tasmania. Stored data will be backed up on a daily  
32  
33 basis. Access to the information will be only granted to authenticated investigators from  
34  
35 anywhere using Internet.  
36  
37

38  
39 The custom-built website will generate data collection forms for printing. After completion  
40  
41 these forms will be scanned and then upload to the website. The form data will be entered  
42  
43 onto the website by the research pharmacists. A random sample of the scanned forms will be  
44  
45 checked against the website data to ensure accuracy. Additionally, the website has a  
46  
47 sophisticated series of checks to ensure that fields are entered and that all fields are within  
48  
49 expected values. Researchers at each site will be informed of any incomplete or inconsistent  
50  
51 data.  
52

### 53 54 **Strength of the study**

1  
2  
3 Several features in the design and planning of the project show the strength of study. First,  
4  
5 the study is intended to examine predictors of adherence from different perspectives  
6  
7 including patient characteristics, medication regimens, and the health care system. Patients'  
8  
9 socio-economic status, level of education, belief and knowledge of HIV medication, social-  
10  
11 support and psychosocial variables are mentioned as predictors of adherence elsewhere(36,  
12  
13 37).

14  
15  
16  
17 Second, the study uses multiple measures of adherence, which is recommended in the  
18  
19 literature as there is no gold standard method of adherence measurement(16). Although  
20  
21 patients in sub-Saharan Africa have been reported to have comparable rate of adherence with  
22  
23 those in the developed countries(38), there is a plausible explanation in the literature that  
24  
25 studies in sub-Saharan Africa measure adherence mainly using self-report, which  
26  
27 overestimates adherence by as much as 20%(39). Patients refill their HIV-medication in a  
28  
29 specific government ART clinic pharmacy; this allows us to use pill count and pharmacy  
30  
31 records for adherence measurement(16, 40, 41).  
32  
33  
34

### 35 **Limitation of the study**

36  
37  
38 Rates of patient drop out, loss to follow up and death are high in this setting(8), which may  
39  
40 challenge the success of the project.  
41  
42

43 The study period may not be sufficient to document long-term ADRs, such as endocrine and  
44  
45 metabolic adverse events, which may need more than one year to become apparent. Patients  
46  
47 may not show up in ART clinics for treatment of ADRs or may be treated in other nearby  
48  
49 clinics, which may underestimate incidence of ADRs.  
50  
51

### 52 **Conclusion**



1  
2  
3 The study is expected to provide extensive information about adherence, including the  
4  
5 barriers and facilitators of adherence, and the ADR profile among a cohort of Ethiopian  
6  
7 patients commencing on ART, and will also establish an important foundation for a  
8  
9 subsequent intervention study focussing on improving adherence in ART naïve patients with  
10  
11 HIV/AIDS.  
12

### 13 14 15 **ETHICS AND DISSEMINATION**

16  
17 Ethics approval was obtained from the Tasmania Health and Medical Human Research Ethics  
18  
19 committee (Approval Number: H0012722); and Bahir Dar University's Ethics Committee  
20  
21 (RCS/567/2004). The data will be stored in a locked filing cabinet in the Bahir Dar  
22  
23 University premises for 5 years; afterwards the data will be shredded and disposed in secure  
24  
25 bins. The digital recordings will be erased in accordance with the Tasmanian University  
26  
27 regulations. Access to the filing cabinet and custom-built website will only be granted to  
28  
29 authenticated investigators. We will disseminate our finding at the public presentation to  
30  
31 stakeholders working on HIV/AIDS treatment in Ethiopia. The result of the study will be  
32  
33 reported in peer-reviewed scientific journals, conferences, and seminar presentations.  
34  
35  
36  
37  
38  
39  
40  
41  
42  
43  
44  
45  
46  
47  
48  
49  
50  
51  
52  
53  
54  
55  
56  
57  
58  
59  
60

**Funding**

None

**Competing Interests**

None

**Contributorship**

WMB, GMP, LC and LREB have contributed equally to the design of the study. WMB drafted the manuscript. PG developed the custom-built website. All authors revised the manuscript and approved the final copy.

**REFERENCES**

1. Ethiopian Federal Ministry of Health HIV AIDS Prevention and Control office (HAPCO). Country progress report in HIV/AIDS response 2012.
2. Reniers G, Araya T, Davey G, Nagelkerke N, Berhane Y, Coutinho R, et al. Steep declines in population-level AIDS mortality following the introduction of antiretroviral therapy in Addis Ababa, Ethiopia. *AIDS*. 2009 Feb 20;23(4):511-8.
3. Ethiopian Federal Ministry of Health HIV/AIDS Prevention and Control Office (HAPCO). *AIDS in Ethiopia six report*. 2010.

- 1  
2  
3 4. Assefa Y, Kiflie A, Tesfaye D, Mariam DH, Kloos H, Edwin W, et al. Outcomes of  
4  
5 antiretroviral treatment program in Ethiopia: Retention of patients in care is a major  
6  
7 challenge and varies across health facilities. *BMC Health Serv Res*. 2011;11(1):81.  
8
- 9  
10 5. Beyene KA, Gedif T, Gebre - Mariam T, Engidawork E. Highly active antiretroviral  
11  
12 therapy adherence and its determinants in selected hospitals from south and central Ethiopia.  
13  
14 *Pharmacoepidemiol Drug safety*. 2009;18(11):1007-15.  
15
- 16  
17 6. Carr A, Cooper DA. Adverse effects of antiretroviral therapy. *Lancet*.  
18  
19 2000;356(9239):1423-30.  
20
- 21  
22 7. Ethiopian Federal Ministry of Health HIV AIDS prevention and control office. Multi-  
23  
24 sectoral HIV/AIDS response monitoring & evaluation report 2011.  
25
- 26  
27 8. Wubshet M, Berhane Y, Worku A, Kebede Y, Diro E. High loss to followup and early  
28  
29 mortality create substantial reduction in patient retention at antiretroviral treatment program  
30  
31 in North-West Ethiopia. *ISRN AIDS*. 2012;2012.
- 32  
33 9. Spire B, Duran S, Souville M, Leport C, Raffi F, Moatti JP. Adherence to highly  
34  
35 active antiretroviral therapies (HAART) in HIV-infected patients: from a predictive to a  
36  
37 dynamic approach. *Soc Sci Med*. 2002;54(10):1481-96.  
38
- 39  
40 10. Ingersoll KS, Cohen J. The impact of medication regimen factors on adherence to  
41  
42 chronic treatment: a review of literature. *J Behav Med*. 2008 Jun;31(3):213-24.
- 43  
44 11. Merten S, Kenter E, McKenzie O, Musheke M, Ntalasha H, Martin-Hilber A. Patient-  
45  
46 reported barriers and drivers of adherence to antiretrovirals in sub-Saharan Africa: a meta-  
47  
48 ethnography. *Trop Med Int Health*. 2010 Jun;15 (Suppl 1):16-33.  
49
- 50  
51 12. Wasti SP, van Teijlingen E, Simkhada P, Randall J, Baxter S, Kirkpatrick P, et al.  
52  
53 Factors influencing adherence to antiretroviral treatment in Asian developing countries: a  
54  
55 systematic review. *Trop Med Int Health*. 2012 Jan;17(1):71-81.  
56

- 1  
2  
3 13. Mbuagbaw L, van der Kop ML, Lester RT, Thirumurthy H, Pop-Eleches C, Smieja  
4 M, et al. Mobile phone text messages for improving adherence to antiretroviral therapy  
5 (ART): a protocol for an individual patient data meta-analysis of randomised trials. *BMJ*  
6  
7  
8  
9  
10 Open. 2013;3(5).
- 11  
12 14. van der Kop ML, Ojaka DI, Patel A, Thabane L, Kinagwi K, Ekstrom AM, et al. The  
13  
14 effect of weekly short message service communication on patient retention in care in the first  
15  
16 year after HIV diagnosis: study protocol for a randomised controlled trial (WelTel Retain).  
17  
18  
19 *BMJ Open*. 2013;3(6).
- 20  
21 15. Amberbir A, Woldemichael K, Getachew S, Girma B, Deribe K. Predictors of  
22  
23 adherence to antiretroviral therapy among HIV-infected persons: a prospective study in  
24  
25 Southwest Ethiopia. *BMC Public Health*. 2008;8(1):265.
- 26  
27 16. Paterson DL, Potoski B, Capitano B. Measurement of adherence to antiretroviral  
28  
29 medications. *J Acquir Immune Defic Syndr*. 2002 Dec 15;31 (Suppl 3):103-6.
- 30  
31  
32 17. Oyugi JH, Byakika-Tusiime J, Charlebois ED, Kityo C, Mugerwa R, Mugenyi P, et  
33  
34 al. Multiple validated measures of adherence indicate high levels of adherence to generic HIV  
35  
36 antiretroviral therapy in a resource-limited setting. *J Acquir Immune Defic Syndr*. 2004 Aug  
37  
38 15;36(5):1100-2.
- 39  
40  
41 18. Chesney MA, Ickovics JR, Chambers DB, Gifford AL, Neidig J, Zwickl B, et al. Self-  
42  
43 reported adherence to antiretroviral medications among participants in HIV clinical trials: the  
44  
45 AACTG adherence instruments. Patient Care Committee & Adherence Working Group of the  
46  
47 Outcomes Committee of the Adult AIDS Clinical Trials Group (AACTG). *AIDS Care*. 2000  
48  
49 Jun;12(3):255-66.
- 50  
51  
52  
53  
54  
55  
56  
57  
58  
59  
60

- 1  
2  
3 19. Reynolds NR, Sun J, Nagaraja HN, Gifford AL, Wu AW, Chesney MA. Optimizing  
4 measurement of self-reported adherence with the ACTG Adherence Questionnaire: a cross-  
5 protocol analysis. *J Acquir Immune Defic Syndr*. 2007 Dec 1;46(4):402-9.  
6  
7  
8  
9  
10 20. Simoni JM, Kurth AE, Pearson CR, Pantalone DW, Merrill JO, Frick PA. Self-report  
11 measures of antiretroviral therapy adherence: A review with recommendations for HIV  
12 research and clinical management. *AIDS Behav*. 2006 May;10(3):227-45.  
13  
14  
15  
16 21. Sikka R, Xia F, Aubert RE. Estimating medication persistency using administrative  
17 claims data. *Am J Manag Care*. 2005 Jul;11(7):449-57.  
18  
19  
20  
21 22. McMahon JH, Jordan MR, Kelley K, Bertagnolio S, Hong SY, Wanke CA, et al.  
22 Pharmacy adherence measures to assess adherence to antiretroviral therapy: review of the  
23 literature and implications for treatment monitoring. *Clin Infect Dis*. 2011 Feb 15;52(4):493-  
24 506.  
25  
26  
27  
28  
29  
30 23. Wright K, Naar-King S, Lam P, Templin T, Frey M. Stigma scale revised: reliability  
31 and validity of a brief measure of stigma for HIV+ youth. *J Adolesc Health*. 2007  
32 Jan;40(1):96-8.  
33  
34  
35  
36 24. Sarna A, Luchters S, Geibel S, Chersich MF, Munyao P, Kaai S, et al. Short-and long-  
37 term efficacy of modified directly observed antiretroviral treatment in Mombasa, Kenya: a  
38 randomized trial. *J Acquir Immune Defic Syndrom*. 2008;48(5):611-9.  
39  
40  
41  
42  
43 25. Berger BE, Ferrans CE, Lashley FR. Measuring stigma in people with HIV:  
44 Psychometric assessment of the HIV stigma scale. *Res Nurs Health*. 2001;24(6):518-29.  
45  
46  
47  
48 26. Vowles KE, Thompson M. The patient-provider relationship in chronic pain. *Curr*  
49 *Pain Headache Rep*. 2012 Apr;16(2):133-8.  
50  
51  
52  
53  
54  
55  
56  
57  
58  
59  
60

- 1  
2  
3 27. Balfour L, Kowal J, Tasca GA, Cooper CL, Angel JB, Macpherson PA, et al.  
4  
5 Development and psychometric validation of the HIV Treatment Knowledge Scale. *AIDS*  
6  
7 *Care*. 2007 Oct;19(9):1141-8.  
8  
9  
10 28. Horne R, Buick D, Fisher M, Leake H, Cooper V, Weinman J. Doubts about necessity  
11  
12 and concerns about adverse effects: identifying the types of beliefs that are associated with  
13  
14 non-adherence to HAART. *Int J STD AIDS*. 2004;15(1):38-44.  
15  
16 29. Horne R, Weinman J, Hankins M. The beliefs about medicines questionnaire: the  
17  
18 development and evaluation of a new method for assessing the cognitive representation of  
19  
20 medication. *Psychol Health*. 1999;14(1):1-24.  
21  
22  
23 30. Bova C, Route PS, Fennie K, Ettinger W, Manchester GW, Weinstein B. Measuring  
24  
25 patient-provider trust in a primary care population: Refinement of the health care relationship  
26  
27 trust scale. *Res Nurs Health*. 2012 Apr 17.  
28  
29  
30 31. WHO. Monitoring and reporting adverse events: WHO2003.  
31  
32 32. Naranjo CA, Busto U, Sellers EM, Sandor P, Ruiz I, Roberts E, et al. A method for  
33  
34 estimating the probability of adverse drug reactions. *Clin Pharmacol Ther*. 1981;30(2):239-  
35  
36 45.  
37  
38 33. Pirmohamed M, James S, Meakin S, Green C, Scott AK, Walley TJ, et al. Adverse  
39  
40 drug reactions as cause of admission to hospital: prospective analysis of 18 820 patients.  
41  
42 *BMJ*. 2004;329(7456):15-9.  
43  
44  
45 34. Schumock GT, Thornton JP. Focusing on the preventability of adverse drug reactions.  
46  
47 *Hosp Pharm*. 1992 Jun;27(6):538.  
48  
49  
50 35. de Groot A, Dannenburg L, Van Hell JG. Forward and backward word translation by  
51  
52 bilinguals. *J Mem Lang*. 1994;33(5):600-29.  
53  
54  
55  
56  
57  
58  
59  
60

- 1  
2  
3 36. Falagas ME, Zarkadoulia EA, Pliatsika PA, Panos G. Socioeconomic status (SES) as  
4 a determinant of adherence to treatment in HIV infected patients: a systematic review of the  
5 literature. *Retrovirology*. 2008;5(1):1-12.  
6  
7  
8  
9  
10 37. Lamb MR, El-Sadr WM, Geng E, Nash D. Association of adherence support and  
11 outreach services with total attrition, loss to follow-up, and death among ART patients in  
12 Sub-Saharan Africa. *PloS one*. 2012;7(6):e38443.  
13  
14  
15  
16 38. Mills EJ, Nachega JB, Buchan I, Orbinski J, Attaran A, Singh S, et al. Adherence to  
17 antiretroviral therapy in sub-Saharan Africa and North America: a meta-analysis. *JAMA*.  
18 2006 Aug 9;296(6):679-90.  
19  
20  
21  
22  
23 39. Wagner G, Miller LG. Is the influence of social desirability on patients' self-reported  
24 adherence overrated? *J Acquir Immune Defic Syndr*. 2004 Feb 1;35(2):203-4.  
25  
26  
27  
28 40. Miller LG, Hays RD. Measuring adherence to antiretroviral medications in clinical  
29 trials. *HIV Clin Trials*. 2000 Jul-Aug;1(1):36-46.  
30  
31  
32 41. Berg KM, Arnsten JH. Practical and conceptual challenges in measuring antiretroviral  
33 adherence. *J Acquir immune Defic syndrom*. 2006;43(Suppl 1):79.  
34  
35  
36  
37  
38  
39  
40  
41  
42  
43  
44  
45  
46  
47  
48  
49  
50  
51  
52  
53  
54  
55  
56  
57  
58  
59  
60

STROBE 2007 (v4) Statement—Checklist of items that should be included in reports of cohort studies

| Section/Topic            | Item # | Recommendation                                                                                                                                                                       | Reported on page #                              |
|--------------------------|--------|--------------------------------------------------------------------------------------------------------------------------------------------------------------------------------------|-------------------------------------------------|
| Title and abstract       | 1      | (a) Indicate the study’s design with a commonly used term in the title or the abstract                                                                                               | Method section of the abstract page 1           |
|                          |        | (b) Provide in the abstract an informative and balanced summary of what was done and what was found                                                                                  | Method section of the abstract page 1           |
| <b>Introduction</b>      |        |                                                                                                                                                                                      |                                                 |
| Background/rationale     | 2      | Explain the scientific background and rationale for the investigation being reported                                                                                                 | Introduction section page 3-4.                  |
| Objectives               | 3      | State specific objectives, including any prespecified hypotheses                                                                                                                     | Page 4                                          |
| <b>Methods</b>           |        |                                                                                                                                                                                      |                                                 |
| Study design             | 4      | Present key elements of study design early in the paper                                                                                                                              | Page 4-5                                        |
| Setting                  | 5      | Describe the setting, locations, and relevant dates, including periods of recruitment, exposure, follow-up, and data collection                                                      | Page 4-8                                        |
| Participants             | 6      | (a) Give the eligibility criteria, and the sources and methods of selection of participants. Describe methods of follow-up                                                           | Page 4-9                                        |
|                          |        | (b) For matched studies, give matching criteria and number of exposed and unexposed                                                                                                  | N/A                                             |
| Variables                | 7      | Clearly define all outcomes, exposures, predictors, potential confounders, and effect modifiers. Give diagnostic criteria, if applicable                                             | Page 8-11                                       |
| Data sources/measurement | 8*     | For each variable of interest, give sources of data and details of methods of assessment (measurement). Describe comparability of assessment methods if there is more than one group | Page 8-11                                       |
| Bias                     | 9      | Describe any efforts to address potential sources of bias                                                                                                                            | Page 8 (recruitment) and 12 (loss to follow-up) |
| Study size               | 10     | Explain how the study size was arrived at                                                                                                                                            | Page 7                                          |
| Quantitative variables   | 11     | Explain how quantitative variables were handled in the analyses. If applicable, describe which groupings were chosen and why                                                         | Page 11                                         |
| Statistical methods      | 12     | (a) Describe all statistical methods, including those used to control for confounding                                                                                                | Page 12-13                                      |
|                          |        | (b) Describe any methods used to examine subgroups and interactions                                                                                                                  | Page 12-13                                      |

1  
2  
3  
4  
5  
6  
7  
8  
9  
10  
11  
12  
13  
14  
15  
16  
17  
18  
19  
20  
21  
22  
23  
24  
25  
26  
27  
28  
29  
30  
31  
32  
33  
34  
35  
36  
37  
38  
39  
40  
41  
42  
43  
44  
45  
46  
47



|                          |     |                                                                                                                                                                                                              |               |
|--------------------------|-----|--------------------------------------------------------------------------------------------------------------------------------------------------------------------------------------------------------------|---------------|
|                          |     | (c) Explain how missing data were addressed                                                                                                                                                                  | Page 12       |
|                          |     | (d) If applicable, explain how loss to follow-up was addressed                                                                                                                                               | Page 12       |
|                          |     | (e) Describe any sensitivity analyses                                                                                                                                                                        |               |
| <b>Results</b>           |     |                                                                                                                                                                                                              |               |
| Participants             | 13* | (a) Report numbers of individuals at each stage of study—eg numbers potentially eligible, examined for eligibility, confirmed eligible, included in the study, completing follow-up, and analysed            | Page 8 and 12 |
|                          |     | (b) Give reasons for non-participation at each stage                                                                                                                                                         |               |
|                          |     | (c) Consider use of a flow diagram                                                                                                                                                                           |               |
| Descriptive data         | 14* | (a) Give characteristics of study participants (eg demographic, clinical, social) and information on exposures and potential confounders                                                                     | Page 12-13    |
|                          |     | (b) Indicate number of participants with missing data for each variable of interest                                                                                                                          | Page 12       |
|                          |     | (c) Summarise follow-up time (eg, average and total amount)                                                                                                                                                  | Page 12-13    |
| Outcome data             | 15* | Report numbers of outcome events or summary measures over time                                                                                                                                               | Page 7-11     |
| Main results             | 16  | (a) Give unadjusted estimates and, if applicable, confounder-adjusted estimates and their precision (eg, 95% confidence interval). Make clear which confounders were adjusted for and why they were included | N/A           |
|                          |     | (b) Report category boundaries when continuous variables were categorized                                                                                                                                    | N/A           |
|                          |     | (c) If relevant, consider translating estimates of relative risk into absolute risk for a meaningful time period                                                                                             | N/A           |
| Other analyses           | 17  | Report other analyses done—eg analyses of subgroups and interactions, and sensitivity analyses                                                                                                               | N/A           |
| <b>Discussion</b>        |     |                                                                                                                                                                                                              |               |
| Key results              | 18  | Summarise key results with reference to study objectives                                                                                                                                                     | Page 2        |
| <b>Limitations</b>       |     |                                                                                                                                                                                                              |               |
| Interpretation           | 20  | Give a cautious overall interpretation of results considering objectives, limitations, multiplicity of analyses, results from similar studies, and other relevant evidence                                   | Page 14-15    |
| Generalisability         | 21  | Discuss the generalisability (external validity) of the study results                                                                                                                                        | Page 4-12     |
| <b>Other information</b> |     |                                                                                                                                                                                                              |               |
| Funding                  | 22  | Give the source of funding and the role of the funders for the present study and, if applicable, for the original study on which the present article is based                                                | Page 16       |

\*Give information separately for cases and controls in case-control studies and, if applicable, for exposed and unexposed groups in cohort and cross-sectional studies.

1  
2  
3  
4  
5  
6  
7  
8  
9  
10  
11  
12  
13  
14  
15  
16  
17  
18  
19  
20  
21  
22  
23  
24  
25  
26  
27  
28  
29  
30  
31  
32  
33  
34  
35  
36  
37  
38  
39  
40  
41  
42  
43  
44  
45  
46  
47

**Note:** An Explanation and Elaboration article discusses each checklist item and gives methodological background and published examples of transparent reporting. The STROBE checklist is best used in conjunction with this article (freely available on the Web sites of PLoS Medicine at <http://www.plosmedicine.org/>, Annals of Internal Medicine at <http://www.annals.org/>, and Epidemiology at <http://www.epidem.com/>). Information on the STROBE Initiative is available at [www.strobe-statement.org](http://www.strobe-statement.org).

For peer review only

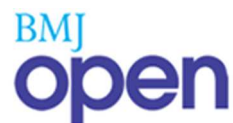

**Adherence to antiretroviral drug therapy in adult HIV-positive patients in Northwest Ethiopia: a study protocol.**

|                                 |                                                                                                                                                                                                                                                                                                                                |
|---------------------------------|--------------------------------------------------------------------------------------------------------------------------------------------------------------------------------------------------------------------------------------------------------------------------------------------------------------------------------|
| Journal:                        | <i>BMJ Open</i>                                                                                                                                                                                                                                                                                                                |
| Manuscript ID:                  | bmjopen-2013-003559.R1                                                                                                                                                                                                                                                                                                         |
| Article Type:                   | Protocol                                                                                                                                                                                                                                                                                                                       |
| Date Submitted by the Author:   | 19-Sep-2013                                                                                                                                                                                                                                                                                                                    |
| Complete List of Authors:       | Bezabhe, Woldesellassie; University of Tasmania, School of Pharmacy<br>Peterson, Gregory; University of Tasmania, School of Pharmacy<br>Bereznicki, Luke; University of Tasmania, School of Pharmacy<br>Chalmers, Leanne; University of Tasmania, School of Pharmacy<br>Gee, Peter; University of Tasmania, School of Pharmacy |
| <b>Primary Subject Heading</b>: | HIV/AIDS                                                                                                                                                                                                                                                                                                                       |
| Secondary Subject Heading:      | Infectious diseases, Pharmacology and therapeutics, Health services research                                                                                                                                                                                                                                                   |
| Keywords:                       | HIV & AIDS < INFECTIOUS DISEASES, Epidemiology < INFECTIOUS DISEASES, CLINICAL PHARMACOLOGY                                                                                                                                                                                                                                    |
|                                 |                                                                                                                                                                                                                                                                                                                                |

SCHOLARONE™  
Manuscripts

STROBE 2007 (v4) Statement—Checklist of items that should be included in reports of cohort studies

| Section/Topic            | Item # | Recommendation                                                                                                                                                                       | Reported on page #                              |
|--------------------------|--------|--------------------------------------------------------------------------------------------------------------------------------------------------------------------------------------|-------------------------------------------------|
| Title and abstract       | 1      | (a) Indicate the study’s design with a commonly used term in the title or the abstract                                                                                               | Method section of the abstract page 1           |
|                          |        | (b) Provide in the abstract an informative and balanced summary of what was done and what was found                                                                                  | Method section of the abstract page 1           |
| <b>Introduction</b>      |        |                                                                                                                                                                                      |                                                 |
| Background/rationale     | 2      | Explain the scientific background and rationale for the investigation being reported                                                                                                 | Introduction section page 3-4.                  |
| Objectives               | 3      | State specific objectives, including any prespecified hypotheses                                                                                                                     | Page 4                                          |
| <b>Methods</b>           |        |                                                                                                                                                                                      |                                                 |
| Study design             | 4      | Present key elements of study design early in the paper                                                                                                                              | Page 4-5                                        |
| Setting                  | 5      | Describe the setting, locations, and relevant dates, including periods of recruitment, exposure, follow-up, and data collection                                                      | Page 4-8                                        |
| Participants             | 6      | (a) Give the eligibility criteria, and the sources and methods of selection of participants. Describe methods of follow-up                                                           | Page 4-9                                        |
|                          |        | (b) For matched studies, give matching criteria and number of exposed and unexposed                                                                                                  | N/A                                             |
| Variables                | 7      | Clearly define all outcomes, exposures, predictors, potential confounders, and effect modifiers. Give diagnostic criteria, if applicable                                             | Page 8-11                                       |
| Data sources/measurement | 8*     | For each variable of interest, give sources of data and details of methods of assessment (measurement). Describe comparability of assessment methods if there is more than one group | Page 8-11                                       |
| Bias                     | 9      | Describe any efforts to address potential sources of bias                                                                                                                            | Page 8 (recruitment) and 12 (loss to follow-up) |
| Study size               | 10     | Explain how the study size was arrived at                                                                                                                                            | Page 7                                          |
| Quantitative variables   | 11     | Explain how quantitative variables were handled in the analyses. If applicable, describe which groupings were chosen and why                                                         | Page 11                                         |
| Statistical methods      | 12     | (a) Describe all statistical methods, including those used to control for confounding                                                                                                | Page 12-13                                      |
|                          |        | (b) Describe any methods used to examine subgroups and interactions                                                                                                                  | Page 12-13                                      |

|                          |     |                                                                                                                                                                                                              |               |
|--------------------------|-----|--------------------------------------------------------------------------------------------------------------------------------------------------------------------------------------------------------------|---------------|
|                          |     | (c) Explain how missing data were addressed                                                                                                                                                                  | Page 12       |
|                          |     | (d) If applicable, explain how loss to follow-up was addressed                                                                                                                                               | Page 12       |
|                          |     | (e) Describe any sensitivity analyses                                                                                                                                                                        |               |
| <b>Results</b>           |     |                                                                                                                                                                                                              |               |
| Participants             | 13* | (a) Report numbers of individuals at each stage of study—eg numbers potentially eligible, examined for eligibility, confirmed eligible, included in the study, completing follow-up, and analysed            | Page 8 and 12 |
|                          |     | (b) Give reasons for non-participation at each stage                                                                                                                                                         |               |
|                          |     | (c) Consider use of a flow diagram                                                                                                                                                                           |               |
| Descriptive data         | 14* | (a) Give characteristics of study participants (eg demographic, clinical, social) and information on exposures and potential confounders                                                                     | Page 12-13    |
|                          |     | (b) Indicate number of participants with missing data for each variable of interest                                                                                                                          | Page 12       |
|                          |     | (c) Summarise follow-up time (eg, average and total amount)                                                                                                                                                  | Page 12-13    |
| Outcome data             | 15* | Report numbers of outcome events or summary measures over time                                                                                                                                               | Page 7-11     |
| Main results             | 16  | (a) Give unadjusted estimates and, if applicable, confounder-adjusted estimates and their precision (eg, 95% confidence interval). Make clear which confounders were adjusted for and why they were included | N/A           |
|                          |     | (b) Report category boundaries when continuous variables were categorized                                                                                                                                    | N/A           |
|                          |     | (c) If relevant, consider translating estimates of relative risk into absolute risk for a meaningful time period                                                                                             | N/A           |
| Other analyses           | 17  | Report other analyses done—eg analyses of subgroups and interactions, and sensitivity analyses                                                                                                               | N/A           |
| <b>Discussion</b>        |     |                                                                                                                                                                                                              |               |
| Key results              | 18  | Summarise key results with reference to study objectives                                                                                                                                                     | Page 2        |
| <b>Limitations</b>       |     |                                                                                                                                                                                                              |               |
| Interpretation           | 20  | Give a cautious overall interpretation of results considering objectives, limitations, multiplicity of analyses, results from similar studies, and other relevant evidence                                   | Page 14-15    |
| Generalisability         | 21  | Discuss the generalisability (external validity) of the study results                                                                                                                                        | Page 4-12     |
| <b>Other information</b> |     |                                                                                                                                                                                                              |               |
| Funding                  | 22  | Give the source of funding and the role of the funders for the present study and, if applicable, for the original study on which the present article is based                                                | Page 16       |

\*Give information separately for cases and controls in case-control studies and, if applicable, for exposed and unexposed groups in cohort and cross-sectional studies.

1  
2 **Note:** An Explanation and Elaboration article discusses each checklist item and gives methodological background and published examples of transparent reporting. The STROBE  
3 checklist is best used in conjunction with this article (freely available on the Web sites of PLoS Medicine at <http://www.plosmedicine.org/>, Annals of Internal Medicine at  
4 <http://www.annals.org/>, and Epidemiology at <http://www.epidem.com/>). Information on the STROBE Initiative is available at [www.strobe-statement.org](http://www.strobe-statement.org).  
5  
6  
7  
8  
9  
10  
11  
12  
13  
14  
15  
16  
17  
18  
19  
20  
21  
22  
23  
24  
25  
26  
27  
28  
29  
30  
31  
32  
33  
34  
35  
36  
37  
38  
39  
40  
41  
42  
43  
44  
45  
46  
47

For peer review only

1  
2  
3  
4  
5  
6  
7 Adherence [to](#) antiretroviral drug therapy in adult HIV-positive patients [in Northwest](#)  
8 [Ethiopia: a study protocol.](#)  
9

10 Woldesellassie M Bezabhe\*<sup>+1,2</sup>, Luke Bereznicki<sup>+1</sup>, Leanne Chalmers<sup>+1</sup>, Peter Gee<sup>+1</sup>, Gregory  
11 M Peterson<sup>+1</sup>  
12

13  
14 \*Correspondence: [mwoldesellassie@yahoo.com](mailto:mwoldesellassie@yahoo.com); [Woldesellassie.Bezabhe@utas.edu.au](mailto:Woldesellassie.Bezabhe@utas.edu.au)  
15

16 + Contributed equally   
17

18 <sup>1</sup>School of Pharmacy, University of Tasmania (UTAS), Sandy Bay Campus, Tasmania  
19  
20 7001, Australia  
21

22 <sup>2</sup>College of Medicine and Health Science, Bahir-Dar University, Bahir-Dar, Gojjam 79,  
23 Ethiopia  
24  
25  
26  
27  
28  
29  
30  
31  
32  
33  
34  
35  
36  
37  
38  
39  
40  
41  
42  
43  
44  
45  
46  
47  
48  
49  
50  
51  
52

## ABSTRACT

**Introduction:** Achievement of optimal [medication](#) adherence and management of antiretroviral toxicity pose great challenges among Ethiopian patients with HIV/-AIDS. There is currently ~~a lack of no~~ long-term follow-up ~~study-studies~~ that ~~identifies-identify~~ the barriers to, and facilitators of, adherence to antiretroviral therapy (ART) in the Ethiopian setting.

Therefore, we aim to investigate the level of adherence to ART and a wide range of potential ~~facilitators of, and barriers to adherence~~ [influencing factors](#), including adverse drug reactions (ADRs) occurring with ART.

**Methods and analysis:** We ~~have been~~ [are will](#) conducting a one-year ~~prospectively~~ [cohort-](#) [longitudinal](#) study involving adult patients with HIV/AIDS commencing on ART between December 2012 and March 2013. Data ~~have will been~~ [is being](#) collected on patients' appointment dates in the ART clinics. Adherence to ART ~~has been~~ [is being](#) ~~will be~~ measured using pill count, medication possession ratio, and patient's self-report ~~methods~~. The primary outcome of the study will be the proportion of patients who are adherent to [their](#) ART regimen at 3, 6, ~~and~~ 12 months ~~of the study~~ using [pPill cCount \(PC\)](#). ~~The optimal level of adherence in this study will be~~ [Taking 95% or more of the dispensed ART regimen using pill count at given points in of time will be considered the optimal level of adherence in this study](#). Data will be analysed using ~~the~~ descriptive and inferential statistical procedures.

### Ethics and dissemination:

Ethics approval was obtained from the Tasmania Health and Medical Human Research Ethics ~~committee~~ [Committee \(Approval Number: H0012722\)](#); and Bahir-Dar University's Ethics Committee ~~(Approval Number: RCS/567/2004)~~. The results of the study will be reported in peer-reviewed scientific journals, conferences, and seminar presentations.



## ARTICLE SUMMARY

### Article focus

- To establish the level of adherence and identify factors that influence adherence to ART in Ethiopian HIV/AIDS patients ~~with-in a~~ cohort study.

### Key messages:

- Factors that affect adherence to ART ~~are not still~~have not yet been identified in Ethiopian HIV/AIDS ~~patients with-in a~~ long-term follow-up study.
- Data ~~for this~~obtained during this prospective cohort study over the period of at least of ~~126~~ months will identify important factors associated with long-term adherence to ART, that will assist in optimising the outcomes of Ethiopian HIV/AIDS patients that are not still identified in the setting.

### Strength and limitations of this study

- This study will is the first of its kind conducted in the country to identify factors that affect adherence to ART in ~~the~~ treatment naïve patients who are initiated on ART with long-term follow-up.
- Rates of patient drop out; loss to follow up and death are high in this setting, which may challenge the success of the project.

## INTRODUCTION

Ethiopia is home to approximately 800,000 patients with HIV/AIDS and the prevalence of HIV/AIDS in the general population is estimated to be 1.5%(1). The ~~introduction of the~~ free antiretroviral therapy (ART) program in Ethiopia, ~~introduced in~~ ~~since~~ 2005, ~~has~~ decreased mortality and morbidity ~~and~~ improved the quality of life of patients(2)(~~2,3~~). In the last 8 years, decentralization and scale-up of the HIV care program has occurred ~~and~~ by the end of 2011, 249,174 adult patients (86% of eligible patients) were on ART(1).

Achievement of optimal medication adherence, management of antiretroviral drug-related toxicities ~~and~~ patient retention(3, 4) ~~(5)(5)~~ are becoming the greatest challenges in the management of HIV/ADS in Ethiopia. A cross-sectional study ~~in~~ ~~of~~ Ethiopian patients reported an adherence rate of 88.1%(5), which is below the near perfect adherence ( $\geq 95\%$ ) required to maintain the effectiveness of ART(6).

Patient retention in HIV care facilities is low, ~~and~~ averaged 51% to 85% in 55 Ethiopian HIV care facilities in a 2-year patient follow-up study(3). Similarly, a 2011 report from the Ethiopian Ministry of Health indicated that patients dropping out from HIV care was a serious issue, with up to 40% of patients who ~~initiated~~ ~~commenced~~ ART dropping out from treatment in some regions of the country(7). Mortality and drop out from ~~antiretroviral~~ treatment are ~~more~~ ~~most~~ common in the first year of patient follow-up ~~than later~~ in Ethiopia(8).

1  
2  
3  
4  
5  
6  
7 Adherence to medication is a dynamic behaviour affected by factors related to treatment  
8 regimen complexity, patient-related variables, patient-health care provider relationships, and  
9 the quality of health care services(9). Patient adherence to ART is influenced by regimen-  
10 related factors such as pill burden, frequency of dosing, [adverse drug reactions](#)  
11 [\(ADRs\)](#)ADRs, and fluid and dietary restrictions(10). Similarly, patient-related factors such  
12 as lack of transport, shortage of food, use of traditional medicine, alcohol abuse, depression,  
13 stigma and discrimination, and lack of social support undermine adherence(11-14). Further,  
14 a poor patient-health care provider relationship and low quality services, such as lack of  
15 confidentiality and privacy, and drug stock outs [can](#) hamper adherence with ART(12).  
16  
17  
18  
19  
20  
21  
22  
23

#### 24 JUSTIFICATION FOR THIS STUDY

25  
26  
27 [The sustainable effectiveness of ART depends on patient's ability to adhere with their long-](#)  
28 [term ART. There is a lack of long-term follow-up studies to identify the various factors](#)  
29 [altering the medication adherence to ART in Ethiopia. Adverse effects of ART are common](#)  
30 [and cause morbidities and mortalities, and have been reported to be a cause of non-adherence.](#)  
31 [Previous studies were retrospective cross-sectional studies, lacked active surveillance and did](#)  
32 [not focus on treatment naïve HIV/AIDS patients.](#) While one prospective study has  
33 investigated adherence to ART in Ethiopia(15) it was only conducted for three months and  
34 also did not focus on treatment naïve patients. A prospective study [with over](#) a longer [follow-](#)  
35 [up period of time](#) focusing on treatment naïve patients is required to assess the level of  
36 adherence in this patient group and its barriers and facilitators. There is also a need to  
37 conduct a prospective study in Ethiopian patients with HIV/AIDS to assess the emergence of  
38 ADRs to ART in clinical practice, [and the potential relationship between ADRs and non-](#)  
39 [adherence to ART.](#)  
40  
41  
42  
43  
44  
45  
46  
47  
48  
49  
50  
51  
52

## OBJECTIVES

The objectives of this study are to establish the level of [medication](#) adherence and identify factors that influence [medication](#) adherence, and assess the incidence of ADRs and associated risk factors in Ethiopian patients with HIV/AIDS initiated on ART.

## METHODS AND ANALYSIS:

### Study design

This study is a prospective, ~~longitudinal~~ cohort study, in which adult Ethiopian patients with HIV/AIDS initiated on ART ~~have will have been~~ [will be](#) followed from the time of ART initiation (Month (M) =0) to 12 months of therapy (M=12). ~~qualitative study involving~~ ~~further~~ ART-initiated patients have an appointment every month for six months and every three months thereafter in ART clinics in Ethiopia; research pharmacists ~~will are~~ [collecting](#) data on appointment dates. The timeline of data collection activities ~~are is~~ structured as shown in figure 1. [The data collection points coinciding with the patients' clinic appointments, not representing additional contact with healthcare providers to minimize the Hawthorne effect on adherence.](#) The sequencing and repeating of measures is to observe the time pattern of different predictors on adherence ~~of to~~ ART in treatment naïve patients.

Depression, stigma, HIV-treatment knowledge, healthcare relationship, and belief about medication, and HIV-symptom index may affect adherence in a time-dependent manner and are [being](#) measured before and after 6 months of patients' ART [using validated scales](#). Data ~~s~~ regarding the concomitantly administered medications, comorbidities, ADRs, and laboratory

Formatted: Don't adjust space between Latin and Asian text, Don't adjust space between Asian text and numbers

values are being collected on every appointment dates. We have also designed a separate qualitative study to be conducted side by side involving patients taking ART, and nurses and peer counsellors working in ART clinics to help to explore the unique factors that affect adherence in these settings.

For peer review

1  
2  
3  
4  
5  
6  
7  
8  
9  
10  
11  
12  
13  
14  
15  
16  
17  
18  
19  
20  
21  
22  
23  
24  
25  
26  
27  
28  
29  
30  
31  
32  
33  
34  
35  
36  
37  
38  
39  
40  
41  
42  
43  
44  
45  
46  
47  
48  
49  
50  
51  
52  
53  
54  
55  
56  
57  
58  
59  
60

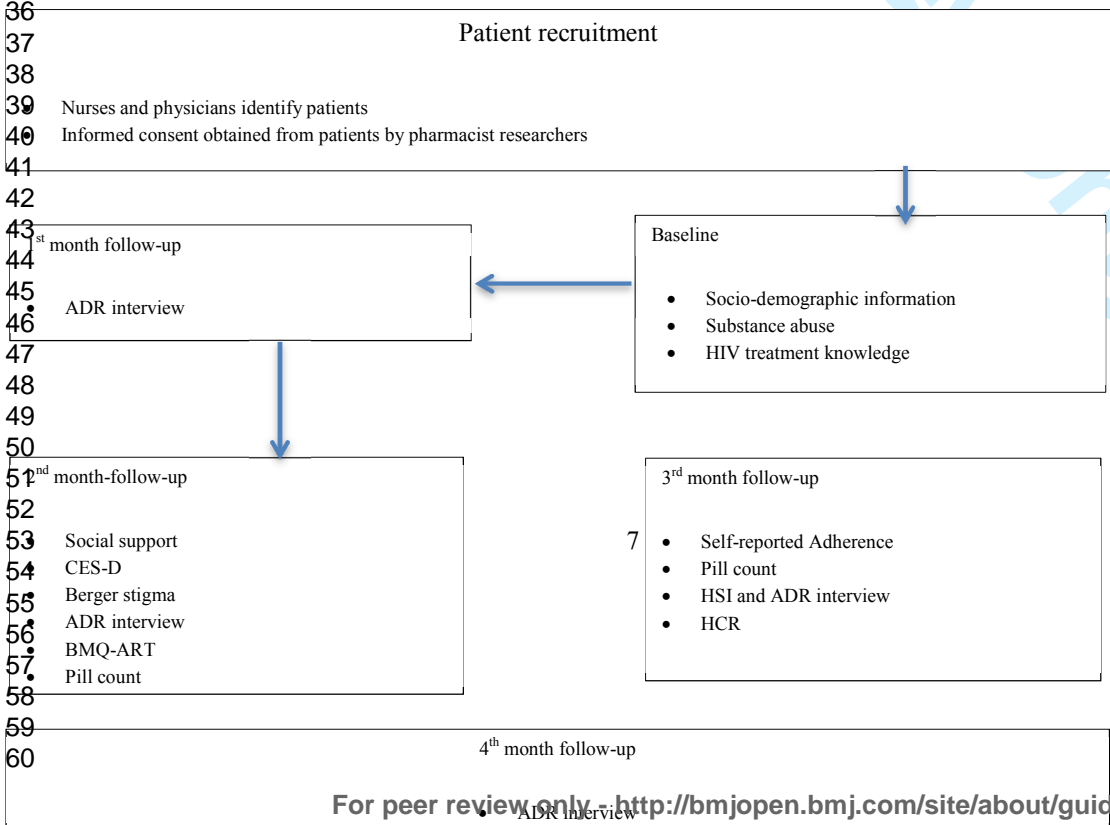

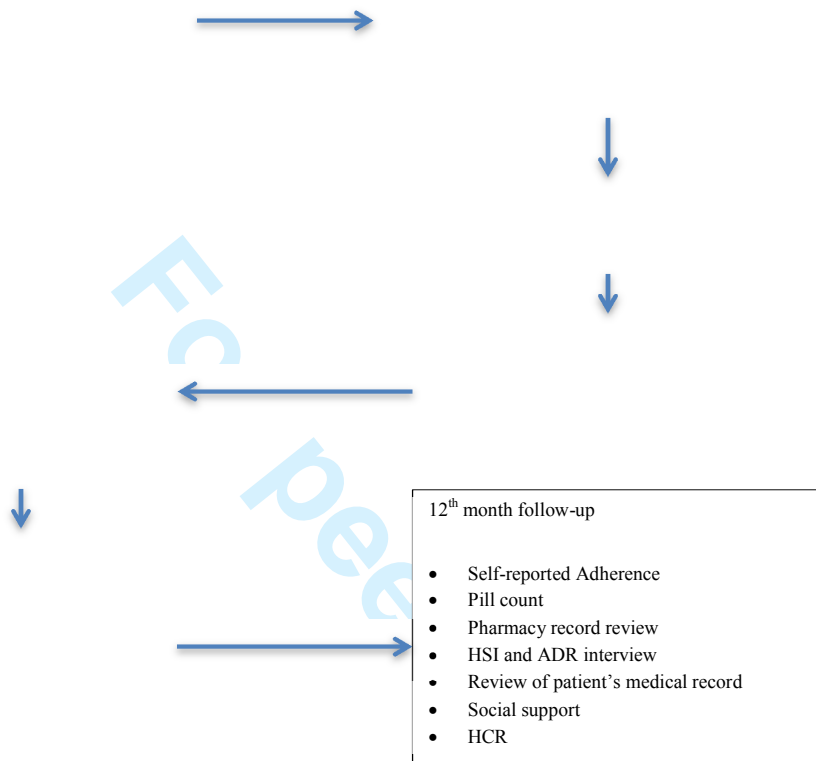

Figure 1 Study design

CES-D=Centre for Epidemiological Studies-Depression

HSI=HIV-Symptom Index

ADR=Adverse Drug Reaction

BMQ=Belief about Medication Questionnaire

HCR=Health Care Relationship

### Study setting

The project ~~is being will be carried out implemented~~ in two hospitals in Northwest Ethiopia:

Gondar University Hospital and Felege-Hiwot Hospital. ~~Each hospital has 400 beds and serves a catchment area of 5 million people. The total number of HIV/AIDS patients attending each hospital is approximately 7,000 and 10,000 at Gondar University Hospital and Felege-Hiwot Hospital, respectively. Recruitment into the study occurred between This study will be conducted between~~ December 2012 ~~and March 2013. The study will continue up to~~

~~and~~ March 2014, which will allow a follow-up period of at least 12 months for each patient.

#### **Inclusion criteria/Exclusion criteria:**

➤ All HIV/AIDS patients at least 18 years ~~old being~~ and initiated on ART for the first ~~time, time~~ are ~~invited to participate.~~ Participants ~~whose follow-up was to be conducted in outlying areas, rather than at the hospital where ART was initiated, are~~ not included.

#### **Exclusion criteria:**

➤ ~~Participants whose follow-up is to be conducted in outlying areas, rather than at the hospital where ART was initiated.~~

#### **Sample size**

The sample size for this study was determined based on a previous study, where 76% of patients had optimal dose, time, and food adherence to ART(15). Taking a 95% confidence level, and precision of 0.07, the sample size was estimated to be 143.

Based on an average of 43 new patients per month, within four months of recruitment in each ART clinics, the pool of patients for recruitment will be 344. Allowing for a non-participation rate of 23%, and loss to follow-up of up to 30% (Mekides B and Desalew K, July 2012, personal communication), the sample size ~~is~~ was achievable.

#### **Recruitment**

Between December 2012 and March 2013, participants ~~were~~ will be initially invited by their nurses to participate in this study. At the first visit (usually two weeks before ART initiation), nurses ~~will~~ give patients information about the study and ~~invited~~ d them to participate. If patients ~~were~~ are interested in participating in the study, the research pharmacists contacted

Formatted: Font: 12 pt

Formatted: Font: 12 pt

Formatted: No bullets or numbering

Formatted: Font: 13 pt, Bold, (Asian) Chinese (PRC), (Other) English (Australia)

Formatted: Indent: Left: 0"

Formatted: Indent: Left: 0.25", No bullets or numbering

Formatted: Font: 12 pt

Formatted: Font: 12 pt

1  
2  
3  
4  
5  
6  
7 ~~them~~ to discuss the research. Informed consent ~~was will be~~ obtained from volunteer  
8 participants using ~~a~~ standard information statement and consent forms. Each ~~of~~ participants  
9 ~~has been will receive~~ ~~is receiving~~ ~~res~~ \$US 3 to reimburse their time and transport costs. ~~—~~The  
10 characteristics of patients who declined participation ~~were will be~~ collected to determine the  
11 representativeness of the sample.  
12  
13  
14  
15

## 16 Measures

17  
18 The questionnaires have been spread to track changes of the different parameters over time as  
19 shown in figure 1, while ~~minimizing~~ ~~minimising~~ questionnaire fatigue. Assessment of  
20 adherence is a problematic issue as there is no gold standard method of measurement(16). In  
21 this study self-report, ~~pill count~~PC and Medication Possession Ratio (MPR) ~~will are~~ ~~being~~  
22 used to measure adherence at months ~~3, 6, 9,~~ and 12. Use of multiple measures of adherence  
23 is recommended in literature as there is no single optimal measure of adherence(16).  
24  
25  
26  
27  
28  
29

30 Adherence to medication found using multiple measures ~~will would could~~ be converted in-to  
31 ~~percentage of~~ dose adherence and triangulated. ~~For instance~~ ~~example,~~ ~~self-reported~~  
32 ~~percentage adherence over 30 days will be triangulated with percentage dose adherence~~  
33 ~~obtained using pill count~~ ~~over~~ the same duration, which will be useful to estimate  
34 ~~the patients' true medication adherence of patients.~~ ~~Participants will access to both fixed~~  
35 ~~combination and loss combination ART dose.~~ Percentage adherence to each of the ~~pills~~  
36 ~~medications~~ will be calculated and the lowest dose adherence ~~is~~ taken as the adherence for  
37 ~~the a~~ given patient.  
38  
39  
40  
41  
42  
43  
44  
45

46 The primary outcome of the study will be the proportion of patients who are adherent to ~~their~~  
47 ART regimen at 3, 6, ~~and~~ 12 months ~~of the study~~ using ~~pill count~~PC. The optimal level of  
48 adherence in this study will be ~~considered as~~ taking 95% or more of the dispensed ART  
49  
50  
51  
52



1  
2  
3  
4  
5  
6  
7 regimen [using pill count](#) at a point in time. Adherence from [pill count](#)PCs will be calculated  
8 by dividing the difference between current and previous [pill count](#)PCs by the number of pills  
9 that have to be taken during the same period(5). [Pill count](#)Cs have been found to be an  
10 economic and reliable measure of adherence in resource-limited settings(17).

11  
12  
13  
14  
15 A modified AIDS Clinical Trial Group (ACTG) self-reported [adherence](#) questionnaire that  
16 asks patients how many doses they missed in the last 7 days [is/will being](#) used to measure  
17 [patients' dose adherence-of patients](#) to ART. In addition, two four-item modified  
18 questionnaires from [the ACTG will be/are being](#) used to measure time and food adherence in  
19 the last 7 days(18). Assessing multiple dimensions of adherence by using all items of [the](#)  
20 ACTG self-reported [adherence](#) questionnaires has provided a strong measure of  
21 adherence(19). Self-reported adherence is well correlated with viral load suppression and [is](#)  
22 [particularly](#) suitable for resource-limited settings because of its low cost(20).

23  
24  
25  
26  
27  
28  
29  
30  
31 Patients stating they have missed medications [have/will/will be/en](#) asked to indicate reasons  
32 why [they skipped medication](#) from a list of 16 reasons (e.g. away from home, busy with other  
33 things, simply [forget/forgot](#)). Fourteen of the reasons for non-adherence are taken from [the](#)  
34 ACTG(18) and two reasons associated with traditional medicine and religious treatment,  
35 respectively, were obtained from literature review(11).

36  
37  
38  
39  
40  
41  
42  
43  
44  
45  
46  
47  
48  
49  
50  
51  
52  
53  
54  
55  
56  
57  
58  
59  
60  
Pharmacy refill records [are being/will be](#) reviewed and the MPR will be calculated by  
dividing the total number of days covered with the medication dispensed by the number of  
days between the first fill and the last refill plus the days' supply of the last refill(21). This  
method is suitable in our study as HIV-medication is refilled only from the nearby  
governmental hospital/health centre pharmacy in Ethiopia(1). [Pill count](#)C and MPR are  
superior [over-to](#) self-reported adherence measures and well correlated with virological failure

1  
2  
3  
4  
5  
6  
7 and clinical outcomes(22). [Biological surrogate markers such as viral load and CD4 count](#)  
8 [have correlation with medication adherence](#)(23). [The CD4 count is measured every 6](#)  
9 [months in ART clinics; the measures at months 6 and 12 will be used as a biological](#)  
10 [surrogate marker of adherence. Viral load is not routinely measured in Ethiopian clinical](#)  
11 [practice, and so has not been included in the trial protocol.](#)

12  
13  
14  
15  
16  
17 Depression in patients ~~is being~~[will be](#) evaluated using the seven-item questionnaire of the  
18 CES-D scale. This scale has been extensively applied in different settings, including ~~settings~~  
19 ~~to assess depression~~ in HIV/AIDS patients(18). The Revised Berger HIV stigma scale [has](#)  
20 [will been](#) used for measurement of stigma. The 10- items of ~~the~~ Berger stigma scale have  
21 been validated in HIV-positive youth(24). ~~The~~ Berger stigma scale was [also](#) used in Kenyan  
22 patients with HIV/AIDS(25). ~~The~~ ~~A~~ higher score indicates the existence of greater  
23 stigma(26).

24  
25  
26  
27  
28  
29  
30  
31 Previous studies have suggested that a lack of social support predisposes patients with  
32 HIV/AIDS ~~to medication non-adherence~~<sup>??</sup>(27). Patients' satisfaction with the social support  
33 they get from family members and friends and the help of the support for remembering their  
34 medication ~~is will being~~ measured using two four-point scale social support  
35 questionnaires(18).

36  
37  
38  
39  
40  
41 The HIV treatment knowledge scale ~~will is being~~[be](#) used to measure patients' knowledge on  
42 adherence, ADRs and drug resistance. This instrument has been developed and validated by  
43 Balfour et al(28) in HIV/AIDS patients ~~with taking~~ ART.

44  
45  
46  
47 The BMQ ~~is being~~[will be](#) used to measure patients' beliefs about ART. The BMQ consists of  
48 two five-item scales probing patients' beliefs about the necessity of the given medication and  
49 their concerns about possible ADRs(29, 30).

1  
2  
3  
4  
5  
6  
7 The trust between the patients and health care providers ~~is being~~~~will be~~ measured using the  
8 13-item HCR trust scale. Items are rated from 0 to 4; the total score ranges from 0 to 52 and  
9 a higher score indicates a greater level of trust(31).  
10  
11

12  
13 ~~The research pharmacist will interview patients and carers, and reviewing patients' medical~~  
14 ~~records for potential ADRs experienced in the preceding four weeks, and recording the~~  
15 ~~following information using an ADR follow up documentation form: signs and symptoms of~~  
16 ~~ADRs, interventions, outcomes of interventions, laboratory test results, co-morbidities,~~  
17 ~~concomitant medications (name, start and stop date, dose, route, indication), hospitalisations,~~  
18 ~~reasons for regimen changes and new regimens.~~  
19  
20

21 Self-completed HSI ~~has will been~~ used to measure patients' concern about 20 possible  
22 symptoms associated with ART ADRs. The research pharmacists ~~will have been~~~~are~~  
23 interviewing patients, their caregivers, and physicians, and referring to patient's medical  
24 records and documenting detailed information regarding the adverse effects that patients  
25 ~~diagnosed with~~~~experience~~. –The severity of ADRs ~~will is being~~~~be~~ rated using the WHO  
26 ADR severity scale(32). Similarly, a physician and a pharmacist ~~have been~~~~will~~ determine  
27 the causality of each ADRs using Naranjo's probability scale(33). The reliability between  
28 raters and within raters has ~~been~~ improved significantly ( $p < 0.001$ ) with the use of Naranjo's  
29 probability scale(33). This scale has been widely used in various settings(34). In addition, the  
30 Schumock and Thornton scale ~~has will~~ ~~been~~ used to rate the preventability of adverse drug  
31 events(35).  
32  
33  
34  
35  
36  
37  
38  
39  
40  
41  
42  
43  
44  
45  
46

47 Socio-demographic and economic variables such as age, gender, marital status, religion, level  
48 of education, number of children, employment status, ~~and~~ disclosure of HIV status, average  
49  
50  
51

number of meals per day, monthly income, transportation costs to the clinic, and waiting time in the hospital ~~we are will be~~ collected at the baseline.

Laboratory data such as weight, height, history of ADRs, hepatitis B virus (HBV) and hepatitis C virus (HCV) infection status, WHO stage of HIV/AIDS, CD4 count, haematocrit, white blood cell (WBC) count, absolute neutrophil count, platelet count, liver function tests [alanine aminotransferase (ALT), aspartate aminotransferase (AST), alkaline phosphatase (ALP), and bilirubin direct and total], renal function tests [such as blood urea nitrogen (BUN), serum creatinine, and urea], and ART regimen, date of initiation, dose and frequency of treatment, other concomitant medications and comorbidities ~~have will been~~ recorded from patients<sup>2</sup> on each appointment date from their medical records using a ~~baseline~~ clinical and laboratory data collection sheet.

#### ~~Loss to follow-up~~

‘Drop out’ from ART program is defined as patients not presenting for ~~dispensing-refilling~~ of their ART for the last 3 months. Patients’ record ~~will be are being~~ used to calculate the number of days covered by the last dispensed HIV medication and 90 days will be added to determine the date when patients are ~~categorized-categorised~~ as ‘drop outs’. ~~The characteristics of s~~Study subjects who do not make at least 6 months follow-up (~~non-persistent patients~~) will be ~~looked at examined separately and compared with those who are persistent excluded from the study~~. Patients lost ~~from to~~ the follow-up ~~will be are being~~ tracked ~~with by~~ peer counsellors working in the ART clinics of both hospitals using the registered address and phone number of them or their family member or close friend in their medical record ~~which to~~ may help to avoid bias. The reason for being lost ~~from to~~ follow-up ~~has been will be~~ recorded. ~~Analysis of S~~socio-demographic and clinical prognostic

1  
2  
3  
4  
5  
6 characteristics of those ~~are~~ who ~~are~~ lost from the treatment and those continuing ART will be  
7 compared.  
8  
9

### 10 **Missing items**

11  
12 The percentage of missing items for each scale will be calculated for each participant. If  
13 more than 10% ~~of the~~ items of the scale ~~are~~ missed, the patient's total score ~~of then that~~ scale  
14 will be excluded from data analysis at that time point. The proportion of missing participants  
15 for each variable of interest will be calculated.  
16  
17  
18  
19

### 20 **Statistical analysis**

21  
22 Descriptive univariate analysis will be conducted for socio-demographic and economic  
23 variables. Adherers will be compared with non-adherers with the Pearson chi-squared test  
24 for ~~non-numerical~~~~categorical~~ variables and independent samples t-tests for ~~normally~~  
25 ~~distributed continuous data~~~~numerical~~ variables. Similarly, the characteristics of patients who  
26 developed ADRs and did not develop ADRs will be compared ~~with~~ ~~using~~ Pearson chi-  
27 squared tests for categorical variables and independent samples t-test for continuous  
28 variables. Risk factors for adherence will be determined by investigating the influence of  
29 socio-demographic, socio-economic variables, ~~and~~ psychosocial variables, healthcare  
30 provider relationship, beliefs ~~on~~ ~~about~~ medications and ADRs. Risk factors for ADRs will be  
31 determined by investigating the effects of gender, age, body mass index (BMI), CD4 count,  
32 history of drug allergy, comorbidities, concomitant medications, ~~and~~ type of regimen.  
33 Multiple variable binary logistic regression will be used to evaluate the independent  
34 influence of these risk factors on adherence. The exposure and the potential confounders will  
35 be modelled in relation with the outcome variable for adjustment using ~~a~~ multiple-  
36 predicative regression model. The final model will be determined after checking  
37  
38  
39  
40  
41  
42  
43  
44  
45  
46  
47  
48  
49  
50  
51

1  
2  
3  
4  
5  
6  
7 multicollinearity. All statistical calculations will be performed using SPSS Version 21. A p-  
8 value of <0.05 will be considered as statistically significant.

### 9 10 11 Quality control

12 ~~Bilinguals performed the standard forward backward translation to make the questionnaires~~  
13 ~~linguistically and conceptually equivalent(37).~~ The English-speaking native researcher made  
14 the forward translation of the validated questionnaires into Amharic. Two physicians working  
15 in the ART clinics of the Ethiopian hospitals reviewed the developed Amharic versions. A  
16 professional translator made the backward translation to check the difference between the  
17 Amharic versions and the original English versions. The differences between the source  
18 version and target version were settled ~~with by panel of committeea~~ meeting ~~including of~~ the  
19 forward translator, a physician and the back-translator, and final Amharic versions were  
20 developed. The Amharic version was ~~pre~~tested with 460 adult patients receiving ART who  
21 ~~would will~~ not be included in the main study to check for reliability and validity of the  
22 questionnaires. On average it took about 23 minutes for participants to complete the  
23 questionnaires at each appointment date. Items found to be problematic by patients ~~were will~~  
24 ~~be~~ modified.

### 25 26 27 28 29 30 31 32 33 34 35 36 37 38 39 40 41 Data management

42 ~~The investigators have been checking the~~ The collected data ~~for will be checked for~~  
43 completeness, accuracy and clarity ~~by the investigators.~~ ~~These checks have been~~ This  
44 ~~quality checking will be~~ performed daily after data collection and amendments ~~havewill~~ been  
45 made before the next data collection ~~point measure~~. Data clean up and crosschecking have  
46 ~~will also~~ been done prior to data analysis. The research pharmacists have been assessing the

Formatted: Font: 12 pt

Formatted: Font: 12 pt

1  
2  
3  
4  
5  
6  
7 ~~s~~Severity(32), causality(33), and preventability(35) of adverse events ~~will be~~ separately  
8 ~~assessed by a pharmacist and physician~~ using validated algorithms.

9  
10  
11 The data ~~are being will be~~ entered ~~eded~~ from the two study sites in Ethiopia into a custom-built  
12 website housed on a secure server at ~~the~~ University of Tasmania. Stored data ~~will be~~ backed  
13 up on a daily basis. Access to the information ~~is will be~~ only granted to authenticated  
14 investigators from anywhere using ~~the~~ Internet.

15  
16  
17 The custom-built website ~~will generate~~ ~~generatese~~ data collection forms for printing. After  
18 completion these forms ~~are being will be~~ scanned and then upload to the website. The ~~form~~  
19 data ~~from the forms are will be~~ being entered onto the website by the research pharmacists. A  
20 random sample of the scanned forms ~~will have~~ ~~been~~ checked against the website data to  
21 ensure accuracy. Additionally, the website has a sophisticated series of checks to ensure that  
22 fields are entered and that all fields are within expected values. Researchers at each site ~~have~~  
23 ~~will be~~ ~~en~~ informed of any incomplete or inconsistent data.

### 24 **STRENGTHS OF THE STUDY**

25  
26  
27 Several features in the design and planning of the project ~~show contribute to~~ the strengths of  
28 ~~the~~ study. First, the study is intended to examine predictors of adherence from different  
29 perspectives including patient characteristics, medication regimens, ~~and~~ the health care  
30 system. Patients' socio-economic status, level of education, belief and knowledge of HIV  
31 medication, ~~social~~ support and psychosocial variables are mentioned as predictors of  
32 adherence elsewhere(36, 37).

33  
34  
35 Second, the study uses multiple measures of adherence, which is recommended in the  
36 literature as there is no gold standard method of adherence measurement(16). Although  
37 patients in sub-Saharan Africa have been reported to have ~~a~~ comparable rate of adherence

1  
2  
3  
4  
5  
6  
7 with those in the developed countries(38), there is a plausible explanation in the literature that  
8 studies in sub-Saharan Africa measure adherence mainly using self-report, which  
9 overestimates adherence by as much as 20%(39). Patients refill their HIV-medication in a  
10 specific government ART clinic pharmacy; this allows us to use pill count and pharmacy  
11 records for adherence measurement(16, 40, 41).  
12  
13  
14  
15

### 16 **LIMITATIONS OF THE STUDY**

17  
18 Rates of patient drop out, loss to follow up and death are high in this setting(8), which may  
19 challenge the success of the project. The multiple measures of adherence used in the study  
20 may alter patients' ~~behaviour~~ and overestimate ~~their~~ medication adherence (i.e.  
21 Hawthorne effect)(42).  
22  
23  
24  
25  
26

27 The study period may not be sufficient to document long-term ADRs, such as endocrine and  
28 metabolic adverse events, which may need more than one year to become apparent. Patients  
29 may not show up in ART clinics for treatment of ADRs or may be treated in other nearby  
30 clinics, which may underestimate ~~the~~ incidence of ADRs.  
31  
32  
33  
34  
35

### 36 **Conclusion**

37  
38 ~~The study is expected to provide extensive information about adherence, including the~~  
39 ~~barriers and facilitators of adherence, and the ADR profile among a cohort of Ethiopian~~  
40 ~~patients commencing on ART, and will also establish an important foundation for a~~  
41 ~~subsequent intervention study focussing on improving adherence in ART naïve patients with~~  
42 ~~HIV/AIDS.~~  
43  
44  
45  
46  
47

### 48 **ETHICS AND DISSEMINATION**



1  
2  
3  
4  
5  
6  
7 Ethics approval was obtained from the Tasmania Health and Medical Human Research Ethics  
8 committee (Approval Number: H0012722); and Bahir Dar University's Ethics Committee  
9 (RCS/567/2004).  
10 ~~Nurses working in the ART clinics familiarised patients with the study;~~  
11 ~~research pharmacists had delivered further information to the interested participants.~~  
12 ~~Participants had were given the chance to read and understand the information sheet and to~~  
13 ~~ask any questions before providing written consent. A eCopies of the information sheet and~~  
14 ~~consent form had were handed on to study participants who sign consented. All personally~~  
15 ~~identifying information has been removed from the questionnaires and study documents.~~  
16 ~~Study participants have been identified only using a unique study number. Nurse working in~~  
17 ~~the ART clinics familiarised the study; research pharmacists had delivered further~~  
18 ~~information to the interested participants. Participants had given the opportunity chance to~~  
19 ~~read and understand the information sheet and to ask any questions before obtaining written~~  
20 ~~consent. A copy of information sheet and consent form had handed on to study participants~~  
21 ~~who signed. All personally identifying information has been removed from the questionnaires~~  
22 ~~and study document. Study participants have been identified only using a unique study~~  
23 ~~number.~~  
24 ~~The data will be stored in a locked filing cabinet in the Bahir Dar University~~  
25 ~~premises for 5 years; afterwards the data will be shredded and disposed of in secure bins. The~~  
26 ~~digital recordings will be erased in accordance with the Tasmanian University regulations.~~  
27  
28 Access to the filing cabinet and custom-built website will only be granted to authenticated  
29 investigators. We will disseminate our findings ~~at the~~ via a public presentation to stakeholders  
30 working on HIV/AIDS treatment in Ethiopia. The results of the study will be reported in  
31 peer-reviewed scientific journals, conferences, and seminar presentations.

## CONCLUSION

1  
2  
3  
4  
5  
6  
7 [The study is expected to provide extensive information about adherence, including the](#)  
8 [barriers to, and facilitators of, adherence, and the ADR profile among a cohort of Ethiopian](#)  
9 [patients commencing on ART, and](#). This will also establish an important foundation for a  
10  
11 subsequent intervention study focussing on improving adherence in ART naïve patients with  
12  
13 HIV/AIDS.

#### 14 15 16 17 **Author affiliations**

18  
19 <sup>1</sup>School of Pharmacy, University of Tasmania (UTAS), Sandy Bay Campus, Tasmania  
20  
21 7001, Australia

22  
23 <sup>2</sup>College of Medicine and Health Science, Bahir-Dar University, Bahir-Dar, Gojjam, Ethiopia

24  
25 **Acknowledgements** We would like to thank ~~n~~Nurses working in ART clinics of both  
26  
27 hospitals for their participation in the design of the study. We acknowledge Mr Endalkachew  
28  
29 Admassie for his contribution during the design of the study.

30  
31 **Contributors** WMB, GMP, LC, LREB and PG have contributed equally to the design of the  
32  
33 study. WMB drafted the manuscript. PG developed the custom-built website. All authors  
34  
35 revised the manuscript and approved the final copy.

36  
37 **Funding:** The study was financially supported by Tasmanian School of Pharmacy,  
38  
39 University of Tasmania.

40  
41 **Competing interests** None

42  
43  
44 **Ethics Approval** Tasmania Health and Medical Human Research Ethics Committee and  
45  
46 Bahir-Dar University's Ethics Committee

47  
48  
49 **Data sharing statement** No additional data are available

50  
51  
52 **Provenance and peer review** Not commissioned; externally peer reviewed

## REFERENCES

1. Ethiopian Federal Ministry of Health HIV/AIDS Prevention and Control Office. Country progress report in HIV/AIDS response. Addis Ababa: Ethiopian Federal Ministry of Health HIV/AIDS Prevention and Control Office, 2012.
2. Reniers G, Araya T, Davey G, Nagelkerke N, Berhane Y, Coutinho R, et al. Steep declines in population-level AIDS mortality following the introduction of antiretroviral therapy in Addis Ababa, Ethiopia. *AIDS*. 2009 Feb 20;23(4):511-8.
3. Assefa Y, Kiflie A, Tesfaye D, Mariam DH, Kloos H, Edwin W, et al. Outcomes of antiretroviral treatment program in Ethiopia: Retention of patients in care is a major challenge and varies across health facilities. *BMC Health Serv Res*. 2011;11(1):81.
4. Assefa Y, Damme WV, Mariam DH, Kloos H. Toward universal access to HIV counseling and testing and antiretroviral treatment in Ethiopia: looking beyond HIV testing and ART initiation. *AIDS patient care and STDs*. 2010;24(8):521-5.

- 1  
2  
3  
4  
5  
6  
7 5. Beyene KA, Gedif T, Gebre - Mariam T, Engidawork E. Highly active antiretroviral  
8 therapy adherence and its determinants in selected hospitals from south and central Ethiopia.  
9 Pharmacoepidemiol Drug safety. 2009;18(11):1007-15.
- 10  
11  
12 6. Carr A, Cooper DA. Adverse effects of antiretroviral therapy. Lancet.  
13 2000;356(9239):1423-30.
- 14  
15  
16 7. Assefa Y SE, Alebachew A, Assefa A, Hurely R, Pegurri E, Taye H, Tagessu D,  
17 Atnaf Y, Haniko N. Multi-sectoral HIV/AIDS response monitoring & evaluation report.  
18 Addis Ababa: [Ethiopian](#) Federal Ministry of Health HIV/AIDS [Pr](#)evention and [Ce](#)ontrol  
19 [O](#)ffice, 2011.
- 20  
21  
22 8. Wubshet M, Berhane Y, Worku A, Kebede Y, Diro E. High loss to followup and early  
23 mortality create substantial reduction in patient retention at antiretroviral treatment program  
24 in North-West Ethiopia. ISRN AIDS. 2012;2012.
- 25  
26  
27 9. Spire B, Duran S, Souville M, Leport C, Raffi F, Moatti JP. Adherence to highly  
28 active antiretroviral therapies (HAART) in HIV-infected patients: from a predictive to a  
29 dynamic approach. Soc Sci Med. 2002;54(10):1481-96.
- 30  
31  
32 10. Ingersoll KS, Cohen J. The impact of medication regimen factors on adherence to  
33 chronic treatment: a review of literature. J Behav Med. 2008 Jun;31(3):213-24.
- 34  
35  
36 11. Merten S, Kenter E, McKenzie O, Musheke M, Ntalasha H, Martin-Hilber A. Patient-  
37 reported barriers and drivers of adherence to antiretrovirals in sub-Saharan Africa: a meta-  
38 ethnography. Trop Med Int Health. 2010 Jun;15 (Suppl 1):16-33.
- 39  
40  
41 12. Wasti SP, van Teijlingen E, Simkhada P, Randall J, Baxter S, Kirkpatrick P, et al.  
42 Factors influencing adherence to antiretroviral treatment in Asian developing countries: a  
43 systematic review. Trop Med Int Health. 2012 Jan;17(1):71-81.
- 44  
45  
46  
47  
48  
49  
50  
51  
52  
53  
54  
55  
56  
57  
58  
59  
60

- 1  
2  
3  
4  
5  
6  
7 13. Mbuagbaw L, van der Kop ML, Lester RT, Thirumurthy H, Pop-Eleches C, Smieja  
8 M, et al. Mobile phone text messages for improving adherence to antiretroviral therapy  
9 (ART): a protocol for an individual patient data meta-analysis of randomised trials. *BMJ*  
10 *Open*. 2013;3(5).  
11  
12  
13  
14 14. Van der Kop ML, Ojaka DI, Patel A, Thabane L, Kinagwi K, Ekstrom AM, et al.  
15 The effect of weekly short message service communication on patient retention in care in the  
16 first year after HIV diagnosis: study protocol for a randomised controlled trial (WeITel  
17 Retain). *BMJ Open*. 2013;3(6).  
18  
19  
20  
21 15. Amberbir A, Woldemichael K, Getachew S, Girma B, Deribe K. Predictors of  
22 adherence to antiretroviral therapy among HIV-infected persons: a prospective study in  
23 Southwest Ethiopia. *BMC Public Health*. 2008;8(1):265.  
24  
25  
26  
27 16. Paterson DL, Potoski B, Capitano B. Measurement of adherence to antiretroviral  
28 medications. *J Acquir Immune Defic Syndr*. 2002 Dec 15;31 (Suppl 3):103-6.  
29  
30  
31 17. Oyugi JH, Byakika-Tusiime J, Charlebois ED, Kityo C, Mugerwa R, Mugenyi P, et  
32 al. Multiple validated measures of adherence indicate high levels of adherence to generic HIV  
33 antiretroviral therapy in a resource-limited setting. *J Acquir Immune Defic Syndr*. 2004 Aug  
34 15;36(5):1100-2.  
35  
36  
37  
38 18. Chesney MA, Ickovics JR, Chambers DB, Gifford AL, Neidig J, Zwickl B, et al. Self-  
39 reported adherence to antiretroviral medications among participants in HIV clinical trials: the  
40 AACTG adherence instruments. Patient Care Committee & Adherence Working Group of the  
41 Outcomes Committee of the Adult AIDS Clinical Trials Group (AACTG). *AIDS Care*. 2000  
42 Jun;12(3):255-66.  
43  
44  
45  
46  
47  
48  
49  
50  
51  
52  
53  
54  
55  
56  
57  
58  
59  
60

- 1  
2  
3  
4  
5  
6  
7 19. Reynolds NR, Sun J, Nagaraja HN, Gifford AL, Wu AW, Chesney MA. Optimizing  
8 measurement of self-reported adherence with the ACTG Adherence Questionnaire: a cross-  
9 protocol analysis. *J Acquir Immune Defic Syndr*. 2007 Dec 1;46(4):402-9.  
10  
11  
12 20. Simoni JM, Kurth AE, Pearson CR, Pantalone DW, Merrill JO, Frick PA. Self-report  
13 measures of antiretroviral therapy adherence: A review with recommendations for HIV  
14 research and clinical management. *AIDS Behav*. 2006 May;10(3):227-45.  
15  
16  
17 21. Sikka R, Xia F, Aubert RE. Estimating medication persistency using administrative  
18 claims data. *Am J Manag Care*. 2005 Jul;11(7):449-57.  
19  
20  
21  
22 22. McMahon JH, Jordan MR, Kelley K, Bertagnolio S, Hong SY, Wanke CA, et al.  
23 Pharmacy adherence measures to assess adherence to antiretroviral therapy: review of the  
24 literature and implications for treatment monitoring. *Clin Infect Dis*. 2011 Feb 15;52(4):493-  
25 506.  
26  
27  
28  
29 23. Gill CJ, Hamer DH, Simon JL, Thea DM, Sabin LL. No room for complacency about  
30 adherence to antiretroviral therapy in sub-Saharan Africa. *AIDS*. 2005 Aug 12;19(12):1243-  
31 9.  
32  
33  
34  
35 24. Wright K, Naar-King S, Lam P, Templin T, Frey M. Stigma scale revised: reliability  
36 and validity of a brief measure of stigma for HIV+ youth. *J Adolesc Health*. 2007  
37 Jan;40(1):96-8.  
38  
39  
40  
41 25. Sarna A, Luchters S, Geibel S, Chersich MF, Munyao P, Kaai S, et al. Short-and long-  
42 term efficacy of modified directly observed antiretroviral treatment in Mombasa, Kenya: a  
43 randomized trial. *J Acquir Immune Defic Syndrom*. 2008;48(5):611-9.  
44  
45  
46  
47 26. Berger BE, Ferrans CE, Lashley FR. Measuring stigma in people with HIV:  
48 Psychometric assessment of the HIV stigma scale. *Res Nurs Health*. 2001;24(6):518-29.  
49  
50  
51  
52  
53  
54  
55  
56  
57  
58  
59  
60

- 1  
2  
3  
4  
5  
6  
7 27. Vowles KE, Thompson M. The patient-provider relationship in chronic pain. *Curr*  
8 *Pain Headache Rep.* 2012 Apr;16(2):133-8.  
9  
10 28. Balfour L, Kowal J, Tasca GA, Cooper CL, Angel JB, Macpherson PA, et al.  
11 Development and psychometric validation of the HIV Treatment Knowledge Scale. *AIDS*  
12 *Care.* 2007 Oct;19(9):1141-8.  
13  
14 29. Horne R, Buick D, Fisher M, Leake H, Cooper V, Weinman J. Doubts about necessity  
15 and concerns about adverse effects: identifying the types of beliefs that are associated with  
16 non-adherence to HAART. *Int J STD AIDS.* 2004;15(1):38-44.  
17  
18 30. Horne R, Weinman J, Hankins M. The beliefs about medicines questionnaire: the  
19 development and evaluation of a new method for assessing the cognitive representation of  
20 medication. *Psychol Health.* 1999;14(1):1-24.  
21  
22 31. Bova C, Route PS, Fennie K, Ettinger W, Manchester GW, Weinstein B. Measuring  
23 patient-provider trust in a primary care population: Refinement of the health care relationship  
24 trust scale. *Res Nurs Health.* 2012;35:397-408.  
25  
26 32. WHO. Monitoring and reporting adverse events. Geneva: World Health Organization,  
27 2003.  
28  
29 33. Naranjo CA, Busto U, Sellers EM, Sandor P, Ruiz I, Roberts E, et al. A method for  
30 estimating the probability of adverse drug reactions. *Clin Pharmacol Ther.* 1981;30(2):239-  
31 45.  
32  
33 34. Pirmohamed M, James S, Meakin S, Green C, Scott AK, Walley TJ, et al. Adverse  
34 drug reactions as cause of admission to hospital: prospective analysis of 18 820 patients.  
35 *BMJ.* 2004;329(7456):15-9.  
36  
37 35. Schumock GT, Thornton JP. Focusing on the preventability of adverse drug reactions.  
38 *Hosp Pharm.* 1992 Jun;27(6):538.  
39  
40  
41  
42  
43  
44  
45  
46  
47  
48  
49  
50  
51  
52

- 1  
2  
3  
4  
5  
6  
7 36. Falagas ME, Zarkadoulia EA, Pliatsika PA, Panos G. Socioeconomic status (SES) as  
8 a determinant of adherence to treatment in HIV infected patients: a systematic review of the  
9 literature. *Retrovirology*. 2008;5(1):1-12.  
10  
11  
12 37. Lamb MR, El-Sadr WM, Geng E, Nash D. Association of adherence support and  
13 outreach services with total attrition, loss to follow-up, and death among ART patients in  
14 Sub-Saharan Africa. *PloS one*. 2012;7(6):e38443.  
15  
16  
17 38. Mills EJ, Nachega JB, Buchan I, Orbinski J, Attaran A, Singh S, et al. Adherence to  
18 antiretroviral therapy in sub-Saharan Africa and North America: a meta-analysis. *JAMA*.  
19 2006 Aug 9;296(6):679-90.  
20  
21  
22 39. Wagner G, Miller LG. Is the influence of social desirability on patients' self-reported  
23 adherence overrated? *J Acquir Immune Defic Syndr*. 2004 Feb 1;35(2):203-4.  
24  
25  
26 40. Miller LG, Hays RD. Measuring adherence to antiretroviral medications in clinical  
27 trials. *HIV Clin Trials*. 2000 Jul-Aug;1(1):36-46.  
28  
29  
30 41. Berg KM, Arnsten JH. Practical and conceptual challenges in measuring antiretroviral  
31 adherence. *J Acquir immune Defic syndrom*. 2006;43(Suppl 1):79.  
32  
33  
34 42. Haberer JE, Kiwanuka J, Nansera D, Ragland K, Mellins C, Bangsberg DR. Multiple  
35 Measures Reveal Antiretroviral Adherence Successes and Challenges in HIV-Infected  
36 Ugandan Children. *PloS one*. 2012;7(5).  
37  
38  
39  
40  
41  
42  
43  
44  
45  
46  
47  
48  
49  
50  
51  
52  
53  
54  
55  
56  
57  
58  
59  
60
